# Supplementary material for: Comparative Transcriptomics Uncover the Uniqueness of Oocyte Development in the Donkey
Source: Front Genet. 2022 Jan 28;13:839207. doi: 10.3389/fgene.2022.839207 (PMC8832878; doi:10.3389/fgene.2022.839207)
Supplement: Supplementary file 1 [file DataSheet4.CSV]

Sheep's DEGs between GV to MII
	baseMean	log2FoldChange	lfcSE	stat	pvalue	padj
KEF53_t15	4.642157032	3.286957882	1.388926294	2.366545939	0.017954946	0.045605028
KEF53_t22	49.57589241	2.184318087	0.4574451	4.775038766	1.80E-06	1.41E-05
PPP1R7	709.1162804	-2.237554751	0.205954533	-10.86431415	1.70E-27	4.78E-25
ANKMY1	101.981744	-2.156523549	0.333067593	-6.474732442	9.50E-11	2.06E-09
SCLY	55.77673001	-2.161831062	0.499135717	-4.331148804	1.48E-05	9.20E-05
TRPM8	27.34211175	-2.582388648	0.549964858	-4.695552111	2.66E-06	2.00E-05
GJB5	6.280473008	-2.865691316	1.119793482	-2.55912484	0.010493605	0.029063262
GJB4	12.05368052	-2.153225497	0.966924922	-2.226879717	0.025955314	0.061702606
EVA1B	71.52304715	-2.269255579	0.383634071	-5.915156523	3.32E-09	5.04E-08
LSM10	1723.953671	-3.045832946	0.24671022	-12.34579154	5.13E-35	2.67E-32
LOC114114099	29.18851085	-2.119954949	0.628973386	-3.370500241	0.000750318	0.002958731
SLFNL1	319.8271673	-2.569030231	0.339488072	-7.567365236	3.81E-14	1.65E-12
TMEM125	89.05995671	-3.447250899	0.378015764	-9.119331054	7.56E-20	8.50E-18
LOC105607154	26.06462518	2.167049997	0.618295672	3.50487654	0.000456819	0.00192551
CCDC24	6.135962224	-3.279579116	1.256066597	-2.610991426	0.009028016	0.025596871
HPDL	4.201160864	-2.687756395	1.359714145	-1.976706946	0.048074765	0.103218379
PRDX1	39970.35118	-2.805939218	0.215588106	-13.0152784	1.00E-38	7.84E-36
CCDC17	10.72447311	-3.076972343	0.895961426	-3.434268767	0.000594155	0.002420182
FAAH	48.75846564	-2.427021213	0.463442846	-5.236937482	1.63E-07	1.66E-06
TEX38	5.838925675	-4.808121648	1.500722701	-3.203870805	0.001355933	0.004968139
TAL1	2.458556493	4.940383333	1.899257623	2.601218114	0.009289337	0.026215085
LOC121819228	5.844772287	-2.379451304	1.11956684	-2.125332066	0.033558914	0.07652329
SLC5A9	591.9402413	-2.279791067	0.284753456	-8.006192782	1.18E-15	6.88E-14
LOC121819402	7.688338773	3.268380144	1.070697755	3.05257028	0.002268906	0.007788943
DNAI4	13.58822741	2.283314229	0.772290051	2.956550101	0.003111017	0.010247092
LOC105605964	12.02236426	-2.283665409	0.799654414	-2.855815424	0.004292646	0.013540619
LOC114113054	3.886166722	3.615916013	1.565497723	2.309754884	0.020901728	0.051637281
CLCA2	3.532859315	3.487506134	1.562989794	2.231304483	0.025660967	0.061142195
LOC101116002	3.346389716	5.379657661	1.89340781	2.841256718	0.004493612	0.014077586
LOC105611344	2.885971318	-4.799752636	1.810537749	-2.651009425	0.00802516	0.023105866
LOC101116368	62.42898474	-2.999306223	0.414043255	-7.243944176	4.36E-13	1.56E-11
S1PR1	20.97785601	2.12208774	0.711752431	2.981497004	0.002868429	0.00955024
HENMT1	369.3951863	2.000994436	0.26982029	7.416026566	1.21E-13	4.80E-12
C1H1orf194	2252.206496	-2.239313384	0.23536113	-9.514372145	1.83E-21	2.54E-19
SLC22A15	38.33394341	-2.148694212	0.51987658	-4.133085225	3.58E-05	0.000202079
LOC114116588	58.3778866	2.00069505	0.699602985	2.859757738	0.004239647	0.013402711
HSD3B1	636.8513623	2.046390884	0.319414049	6.406702815	1.49E-10	3.08E-09
REG4	6.508486732	6.342873418	1.522537239	4.165989017	3.10E-05	0.000178075
LOC114111412	33.83043897	-2.866829832	0.68824818	-4.165401257	3.11E-05	0.000178317
LOC114111391	7.256348426	-2.424591228	1.022976562	-2.370133704	0.017781654	0.04524414
C1H1orf54	228.3009888	-2.069597543	0.305672447	-6.770638196	1.28E-11	3.38E-10
CTSS	21.78796328	2.253666211	1.017712937	2.214441941	0.026798392	0.063320982
CTSK	5.85875697	2.260867722	1.134257093	1.993258615	0.046233136	0.099941173
TMOD4	6.641502976	-2.573712516	1.105661238	-2.327758655	0.019924923	0.04971648
THEM5	8.830445014	-2.234651034	0.988907143	-2.259717761	0.023838773	0.057597077
LOC121820285	4.85696536	-3.599427011	1.46383472	-2.458902609	0.013936242	0.036848035
LOC101102105	39.02807079	-2.699586684	0.552907559	-4.882528086	1.05E-06	8.78E-06
S100A2	34.5884198	2.107804694	0.657832071	3.20416834	0.001354533	0.004965914
TRNAM-CAU	5.16244958	-3.66164691	1.407752403	-2.601058895	0.00929365	0.026223314
SLC27A3	7.037748264	-2.675477969	1.077423746	-2.483217934	0.01302014	0.034813071
HAX1	3592.743055	-2.182438723	0.208154975	-10.48468204	1.02E-25	2.31E-23
TDRD10	1497.479539	-2.357612132	0.217236834	-10.85272736	1.94E-27	5.35E-25
DPM3	630.2126516	-2.039079309	0.216773108	-9.40651415	5.13E-21	6.73E-19
BGLAP	6.404819842	-2.937751473	1.165523437	-2.5205426	0.011717405	0.031895837
TSACC	3044.244269	-3.576886766	0.19821508	-18.04548252	8.56E-73	8.04E-69
CRABP2	133.3900143	2.361483257	0.288121555	8.196135324	2.48E-16	1.59E-14
MRPL24	474.3819584	-2.696387211	0.234043286	-11.5208911	1.04E-30	4.32E-28
LOC101112109	8.162134475	-4.387670583	1.317180142	-3.331108968	0.000865007	0.003355796
LOC443441	5.496124225	-2.666785669	1.189177478	-2.242546397	0.02492608	0.059739877
SPTA1	12.41187815	2.225060164	0.907498369	2.451861336	0.014211942	0.037503069
DUSP23	198.4844241	-2.380914816	0.312056996	-7.629743444	2.35E-14	1.07E-12
CFAP45	115.3731791	-2.79245282	0.330628105	-8.445902738	3.02E-17	2.24E-15
LOC101104293	2.192709055	-4.401495555	1.989686615	-2.212155182	0.026955944	0.063606273
USF1	311.3147049	-2.057721658	0.290216038	-7.090309935	1.34E-12	4.35E-11
NR1I3	12.75655421	-2.545235412	0.840532811	-3.028121424	0.002460792	0.008349973
RGS4	10.61784206	6.071126041	1.397695245	4.343669381	1.40E-05	8.75E-05
LOC114109109	3.977211826	-4.231300471	1.666355765	-2.539253959	0.011108915	0.030528788
GPR161	181.2442979	-3.040416185	0.28379247	-10.71351958	8.80E-27	2.33E-24
LOC101114740	7.625008461	2.475266218	0.969576385	2.552935753	0.01068192	0.029499309
LOC114109637	3.195517985	4.287004396	1.803239156	2.377390921	0.017435599	0.044502607
SAMSN1	3.256270106	5.351679738	2.077577719	2.575922763	0.009997298	0.027890247
PROS1	9.242118236	2.245376576	1.02447911	2.191725097	0.028399362	0.066444459
NFKBIZ	9.602366506	2.864288144	1.122865557	2.550873634	0.010745328	0.029651104
LOC105612547	18.27697818	2.329146567	0.682492595	3.412705992	0.000643213	0.00258816
LOC121816359	6.876196935	-5.050503401	1.468225034	-3.439870104	0.000581993	0.002377866
CCDC80	4.679813916	2.443504694	1.238153286	1.973507418	0.04843778	0.10383158
LOC101107153	2665.808272	-2.08599776	0.211445572	-9.865412349	5.88E-23	9.36E-21
LOC121816503	9273.171782	-2.061529172	0.662316934	-3.11260224	0.001854458	0.006519941
NCBP2AS2	287.6368536	-2.356133307	0.275519891	-8.551590591	1.21E-17	9.78E-16
TMEM44	21.11536488	-2.83067806	0.693548298	-4.08144331	4.48E-05	0.000246827
LOC101108354	25.65766518	3.546328515	0.612909489	5.786055816	7.21E-09	9.96E-08
CLDN16	2.457350758	4.939778999	1.905998513	2.591701392	0.009550263	0.026834326
LOC101111595	4.232963989	2.63770219	1.340974602	1.967003839	0.049182768	0.105260317
SKIL	45.42227285	2.008542863	0.579456182	3.466254954	0.000527763	0.00218578
LOC106990437	39.0822318	2.066390556	0.469123	4.404794816	1.06E-05	6.83E-05
LOC101104288	5.783737831	2.79938063	1.105051429	2.533258232	0.011300767	0.030965387
LXN	143.1057943	2.484166126	0.962533576	2.580861787	0.009855403	0.027564009
PTX3	66.17750382	4.88025354	0.651281055	7.49331414	6.72E-14	2.80E-12
LOC105603748	11.08739234	-3.169199046	0.925593733	-3.42396338	0.000617149	0.002498108
P2RY13	5.819730758	3.187061989	1.526389715	2.087973967	0.036800183	0.082521356
ERICH6	8.743992199	-3.050105796	0.982672222	-3.103889302	0.001909948	0.006687488
TM4SF1	60.28198963	6.691251432	0.866097761	7.725746138	1.11E-14	5.37E-13
LOC121817207	11.46005817	-2.180506014	0.794411623	-2.744806284	0.006054663	0.018147559
TRPC1	11.51941823	2.645069429	0.975061211	2.712721416	0.006673318	0.019737214
RBP1	221.1104454	3.074203391	0.430746059	7.136927502	9.54E-13	3.17E-11
FOXL2	22.11430009	-2.03704943	0.833128321	-2.445060838	0.014482771	0.038083255
LOC101118156	70.6017956	3.156186955	0.51627141	6.113425796	9.75E-10	1.69E-08
NUDT16	312.9799519	-2.279909905	0.2973405	-7.667673597	1.75E-14	8.12E-13
LOC114110419	4.299132513	-3.405602386	1.478159221	-2.303948273	0.021225547	0.052299348
RIPK4	12.89827355	-2.14231954	0.9451084	-2.266744789	0.023405821	0.056718867
LOC101108019	3.404113507	-3.036264751	1.541316077	-1.969917005	0.048847883	0.104591283
LOC101115420	3204.461268	-2.689111192	0.197358892	-13.62548788	2.83E-42	3.12E-39
KCNJ15	8.77363418	-2.256893296	0.908954075	-2.482956352	0.013029705	0.034828727
TMEM18	183.3714401	-2.019635033	0.455698396	-4.431955544	9.34E-06	6.10E-05
ALAD	623.8018133	-2.206489388	0.29306145	-7.529101444	5.11E-14	2.18E-12
WDR31	43.74295904	-2.14975482	0.441965285	-4.864080721	1.15E-06	9.56E-06
LOC121818809	80.99929974	-3.377381267	0.392767595	-8.598930535	8.05E-18	6.69E-16
LOC121818595	2.301745525	-4.473874356	1.940610809	-2.305394949	0.021144464	0.05212692
ABITRAM	2189.81081	2.040418251	0.280396113	7.276913478	3.42E-13	1.25E-11
GADD45G	23.06237604	-4.56982123	0.995187897	-4.591918013	4.39E-06	3.13E-05
LOC121818604	11.94077227	2.428185259	0.789598535	3.075215001	0.002103509	0.007287765
FBP1	22.51763574	2.134275181	0.777171608	2.746208379	0.006028846	0.018098805
CTSL	56.65219444	5.761751224	1.585329214	3.634419383	0.000278607	0.001239443
GAS1	18.60133826	3.029122342	0.784954362	3.858978927	0.000113862	0.000562805
HNRNPK	1627.412959	2.137132615	0.237537298	8.997040169	2.32E-19	2.37E-17
LOC105607182	21984.94481	-3.092491106	0.294830733	-10.48903917	9.70E-26	2.25E-23
LOC114112952	52.89102404	-2.404331764	0.418114637	-5.750412806	8.90E-09	1.20E-07
DCTN3	3377.018572	-2.393721889	0.238711582	-10.02767385	1.15E-23	2.04E-21
NEFM	102.5014412	5.028208055	1.03477684	4.859219749	1.18E-06	9.77E-06
STC1	115.5199188	4.848755512	1.173901605	4.130461607	3.62E-05	0.000204276
SORBS3	65.33344095	-2.007206557	0.389295564	-5.155996484	2.52E-07	2.43E-06
NUDT18	21.71011282	-2.123969427	0.708189133	-2.999155631	0.00270729	0.009068407
NR4A3	8.138902875	2.204389679	0.911067594	2.419567651	0.01553897	0.040408639
LOC114112797	8.913554597	-2.518931018	0.942479549	-2.672663848	0.007525162	0.021880998
GRHPR	4799.958325	-2.124295883	0.280578472	-7.571129278	3.70E-14	1.61E-12
GLIPR2	707.1941807	-2.173661908	0.207331278	-10.48400379	1.02E-25	2.31E-23
TMEM8B	29.38356443	-2.008783185	0.507653615	-3.95699573	7.59E-05	0.00039436
SPAG8	9.792084635	-2.272320622	0.842667247	-2.696581158	0.007005532	0.020567525
CCDC107	1068.745851	-3.56256479	0.241771086	-14.73528056	3.83E-49	5.99E-46
CD72	8.471828007	-3.013911297	0.993918936	-3.032351219	0.002426567	0.008250239
ANXA1	42.07053497	2.071678154	0.71752373	2.88726082	0.003886119	0.012434269
LOC121818637	223.4510329	-2.403622788	0.333281702	-7.211985447	5.51E-13	1.95E-11
CD274	34.95675329	2.04971255	0.523928368	3.912199978	9.15E-05	0.000465402
LOC101121753	7.375450858	2.65659874	1.139686858	2.330990061	0.019753884	0.049412339
LOC121818650	34.91417357	-2.2667835	0.513864754	-4.411245339	1.03E-05	6.66E-05
HACD4	27.53742576	2.719035509	0.584754591	4.649874585	3.32E-06	2.44E-05
LOC114113004	4.283344479	3.78191376	1.502751836	2.516658884	0.011847347	0.032204615
LOC101103702	4.822738096	3.336438967	1.648330173	2.024132677	0.042956502	0.093926083
LOC114112845	23.90315399	2.47977246	0.5740048	4.320124952	1.56E-05	9.61E-05
SMIM27	296.1688574	-2.026233105	0.230979377	-8.772355035	1.75E-18	1.61E-16
NUGGC	12.51645063	-2.526086548	0.802236707	-3.148804494	0.001639398	0.005853703
LOC114113028	6.14752837	-2.808063842	1.17672902	-2.386330067	0.01701747	0.043605026
LOC101116964	3.328359163	3.388076829	1.643875195	2.061030447	0.039300135	0.087200513
LOC105608584	25.31803433	-2.546774984	0.638952021	-3.98586263	6.72E-05	0.000354548
GULP1	10.49800691	2.814776247	0.933356382	3.015757219	0.002563384	0.008655858
ZSWIM2	14.00141742	2.226205045	0.766316808	2.905071402	0.003671693	0.011864921
HOXD4	1323.414916	-3.137664685	0.200224461	-15.67073611	2.40E-55	6.43E-52
SPC25	7159.827571	-2.050822867	0.230948423	-8.880003782	6.69E-19	6.41E-17
GCG	9.606010811	2.87543961	1.119602305	2.568268748	0.010220788	0.028399817
TNFAIP6	4422.152988	8.72072292	0.651878856	13.37782755	8.15E-41	7.29E-38
RBM43	4.301267661	3.153681195	1.41517828	2.22846919	0.025849244	0.061504954
ZEB2	128.6077983	2.78631921	0.41094394	6.780290299	1.20E-11	3.19E-10
LOC106990917	2.354831955	4.884726708	2.182576081	2.23805564	0.025217427	0.060291933
TMEM37	306.8011497	5.849704937	0.351758992	16.62986608	4.24E-62	2.65E-58
SCTR	18.69712623	-2.321519117	0.731292741	-3.174541448	0.001500735	0.005421469
AOX1	211.3971958	3.498597567	0.489823814	7.142563239	9.16E-13	3.06E-11
CASP8	44.12281375	2.022093887	0.45597668	4.434643213	9.22E-06	6.04E-05
LOC121818553	9.151211602	-2.356327446	0.877880977	-2.684108107	0.007272359	0.021241305
IGFBP5	149.1080704	10.8643073	1.682611491	6.456812734	1.07E-10	2.30E-09
RUFY4	2.752849128	-4.730986302	1.849622558	-2.557811744	0.01053331	0.029156028
LOC101111607	150.3101692	-2.032265485	0.311569289	-6.522675886	6.91E-11	1.57E-09
IHH	29.3659097	-7.176233683	1.359167705	-5.279873598	1.29E-07	1.34E-06
PTPRN	2.220374785	4.797532985	2.019565555	2.375527238	0.017523899	0.044685466
INHA	111.6319326	-2.171564856	0.552533566	-3.930195361	8.49E-05	0.000436184
SLC4A3	9.504860155	-2.191638107	1.028455431	-2.130999595	0.033089176	0.075589847
AP1S3	415.6850963	2.006061562	0.264902858	7.572819637	3.65E-14	1.59E-12
LOC101120993	53.02998108	-2.562658512	0.495352322	-5.173405673	2.30E-07	2.24E-06
LOC114113237	10.64078197	-2.865443868	1.049004097	-2.731585012	0.006303048	0.018787084
TMEM39B	254.6100453	-2.772294716	0.290768642	-9.534366219	1.51E-21	2.11E-19
TINAGL1	5.887488717	3.643276765	1.318754523	2.76266485	0.00573316	0.017361278
FABP3	11.20634732	-2.161374563	0.799242996	-2.70427714	0.006845317	0.020163351
CD164L2	4492.114184	-2.492180367	0.268782393	-9.272111694	1.82E-20	2.17E-18
MAP3K6	131.6761701	-2.342193691	0.343053568	-6.82748676	8.64E-12	2.38E-10
TRNP1	34.30648974	-2.155061132	0.520997386	-4.136414484	3.53E-05	0.00019947
KDF1	24.2534281	-2.009412695	0.574088747	-3.500177813	0.000464948	0.001955823
CD52	105.8612867	-2.481643818	0.362019382	-6.855002628	7.13E-12	2.02E-10
LOC121818777	5.760772895	-3.229400392	1.324406353	-2.438375794	0.014753428	0.038654928
LOC106990852	4.435193814	-3.457780394	1.498635376	-2.307285982	0.021038882	0.051921853
LOC114112910	10.96714808	-2.288372501	0.822787761	-2.781242757	0.005415123	0.016550321
TEX46	87.10611902	2.564052217	0.585552804	4.378857383	1.19E-05	7.58E-05
PINK1	254.0695792	-2.156598717	0.27511203	-7.838983703	4.54E-15	2.39E-13
HTR6	4.654286382	-4.470022203	1.574639791	-2.838758571	0.004528941	0.014171713
PAX7	99.61847203	-2.42290932	0.516673646	-4.689438561	2.74E-06	2.06E-05
PADI6	5138.099428	-2.63276929	0.263840517	-9.978639061	1.89E-23	3.17E-21
PADI1	35.1629593	-2.272537389	0.470993596	-4.824985751	1.40E-06	1.14E-05
CPLANE2	18.3474334	-3.135053206	0.733434068	-4.274485388	1.92E-05	0.000115637
FAM131C	9.002173844	-2.085373407	0.954017541	-2.185885812	0.02882396	0.067295329
LOC114112439	333.6914556	-2.119523507	0.221993173	-9.547696778	1.33E-21	1.90E-19
LOC114112490	14716.74241	2.526662416	0.270014031	9.357522668	8.16E-21	1.03E-18
CACNA1B	9.224720023	-2.155490462	0.866481091	-2.487637047	0.01285949	0.03445712
ZMYND19	545.3839273	-3.706763358	0.318785453	-11.62776822	2.98E-31	1.36E-28
MRPL41	714.464525	-2.286704055	0.222573792	-10.27391425	9.24E-25	1.83E-22
TUBB4B	1685.873351	-3.059111024	0.297099662	-10.29658198	7.30E-25	1.46E-22
TPRN	46.51805417	-2.226281986	0.435576389	-5.111117233	3.20E-07	3.01E-06
ANAPC2	178.9913037	-2.587540129	0.363504396	-7.118318681	1.09E-12	3.59E-11
LRRC26	3.081091329	-3.843813459	1.71868249	-2.236488404	0.025319796	0.060490633
AJM1	12.70517078	-2.241178825	0.84262517	-2.659757747	0.007819687	0.022611347
C3H9orf116	1099.480733	-2.557532656	0.233343558	-10.96037397	5.93E-28	1.71E-25
WDR5	3898.238539	-2.396720009	0.301026273	-7.961829991	1.70E-15	9.65E-14
CACFD1	51.36692088	-2.020467767	0.488209755	-4.13852396	3.50E-05	0.000198003
ADAMTS13	21.07504805	-6.693340403	2.147164153	-3.117293288	0.001825199	0.006425494
CCDC187	6.551904376	-2.613875325	1.119640167	-2.334567304	0.019566036	0.049033902
LOC105607253	15.75185846	-2.094860973	0.688068455	-3.044553136	0.002330263	0.007964629
KCNT1	8.642095234	-2.738546379	0.960184559	-2.852104162	0.004343087	0.013679047
GTF3C5	442.4196008	-2.366281687	0.346109313	-6.836804431	8.10E-12	2.25E-10
AK8	504.7816769	-2.513935829	0.262312554	-9.583741964	9.36E-22	1.36E-19
ENDOG	28.23673687	-2.303790647	0.561591236	-4.10225534	4.09E-05	0.00022717
CERCAM	159.4389776	-2.49020183	0.308367105	-8.075445746	6.72E-16	4.05E-14
LOC121818995	5.341705658	-3.109441993	1.272180985	-2.444182101	0.014518097	0.038150128
DNM1	2.679829887	-3.616540868	1.794675878	-2.015149873	0.043888948	0.095531084
FPGS	48.45598298	-2.092963343	0.5160109	-4.056044826	4.99E-05	0.00027229
CFAP157	6.432145678	-2.54186612	1.064567057	-2.387699397	0.016954203	0.043486685
WDR38	15.13826034	-2.127497737	0.685895187	-3.101782574	0.001923592	0.006730302
LOC114113879	6.450703265	-2.564487188	1.059573142	-2.420302181	0.015507614	0.040349785
LOC105611883	622.8211874	-2.470595853	0.276844794	-8.924118888	4.49E-19	4.37E-17
NDUFA8	10842.34042	-3.171894305	0.206884775	-15.33169515	4.70E-53	9.80E-50
ITGB1BP1	2879.706369	-2.295343635	0.234234731	-9.799330876	1.13E-22	1.77E-20
SLC66A3	8.073785616	3.357464694	1.108229783	3.029574503	0.002448985	0.008317424
TRIB2	112.8857005	-2.565369177	0.510568029	-5.024539396	5.05E-07	4.51E-06
LOC106991039	6.598849016	-2.582747632	1.092997242	-2.362995563	0.018127887	0.045994522
LOC121819014	6.407417419	-2.574267043	1.212319743	-2.12342252	0.033718462	0.076803163
LOC121819016	7.582483357	-2.852548868	1.072863549	-2.658817956	0.007841532	0.022653583
GAREM2	6.724082111	-2.044170497	1.037406951	-1.970461538	0.048785499	0.104481535
ADGRF3	6.490118558	-2.286142773	1.120364881	-2.040534125	0.041297156	0.090847937
TMEM214	162.4063859	-2.830944554	0.28934531	-9.783965575	1.32E-22	2.05E-20
KHK	118.6111985	-2.10945001	0.342779346	-6.153958899	7.56E-10	1.35E-08
LOC114113902	31.36952361	-2.900655003	0.633506136	-4.578732296	4.68E-06	3.31E-05
LOC121819018	3.745702116	-5.176139595	1.707528597	-3.031363343	0.002434521	0.008275785
LOC114113587	60.53523455	-3.003641744	0.420251491	-7.14724827	8.85E-13	2.98E-11
LOC121819021	384.7858248	-3.052564834	0.245384233	-12.43993878	1.59E-35	9.61E-33
LOC121819024	10.55605891	-2.613497492	0.899152406	-2.906623478	0.003653527	0.011812315
LOC121818949	31.76589949	-2.987773056	0.564316578	-5.294498112	1.19E-07	1.25E-06
EHD3	9.143560538	-2.864060154	1.023586501	-2.798063624	0.005140998	0.015810296
LOC121819030	6.175406747	-2.490097843	1.262461083	-1.972415528	0.048562191	0.104075834
LOC101120481	238.9589994	5.486996135	1.252113348	4.382188039	1.17E-05	7.48E-05
LOC121819034	6.281854196	-2.539709331	1.10950515	-2.289046906	0.022076627	0.053999597
VAMP5	29.9190115	-2.649393449	0.577094175	-4.590920449	4.41E-06	3.14E-05
SULT1C2	6.472006749	-2.569887008	1.098459067	-2.339538254	0.019307594	0.048496255
LOC121819051	6.977343634	-2.12532012	1.03631267	-2.05084834	0.040281718	0.089041802
GPR75	3.493780969	3.47287407	1.563826989	2.220753379	0.02636767	0.062500897
CHAC2	2.944660217	5.20582628	1.846102931	2.819900338	0.004803857	0.014892987
FSHR	108.3132627	-2.128396594	1.019766506	-2.087141107	0.036875381	0.082670237
LOC121819061	28.93594185	-2.76924526	0.595011816	-4.654101287	3.25E-06	2.39E-05
LOC121819062	2.941751869	-3.772423057	1.762655884	-2.140192587	0.032339206	0.074174375
LOC114113608	12.15067971	-3.927742277	1.014683143	-3.870905223	0.000108432	0.000540089
NDUFAF7	1837.083032	2.126555142	0.290452983	7.321512483	2.45E-13	9.26E-12
ATP6V1B1	50.74976714	-2.899948118	0.444741604	-6.520523578	7.01E-11	1.59E-09
DYSF	73.1240416	-2.070261313	0.349815478	-5.918152399	3.26E-09	4.95E-08
IL1RL1	53.01991045	2.865745278	0.641436727	4.467697528	7.91E-06	5.30E-05
CREG2	10.09661188	-2.146810951	0.902426085	-2.378932732	0.017362844	0.044359114
MRPL30	3072.115828	-2.944380926	0.200492842	-14.68571592	7.96E-49	1.15E-45
LUM	241.536253	6.702933383	0.860982213	7.785217023	6.96E-15	3.52E-13
LOC121819097	15.38982077	-3.432284561	0.806792785	-4.254233086	2.10E-05	0.000125526
TARBP2	585.486644	-2.186854832	0.388207587	-5.633209931	1.77E-08	2.25E-07
MAP3K12	62.57693885	-2.063361408	0.3874192	-5.325914177	1.00E-07	1.08E-06
AAAS	283.9960621	-2.024594932	0.271666605	-7.452498372	9.16E-14	3.71E-12
ITGB7	4.174459806	-2.708642771	1.371961777	-1.974284428	0.048349411	0.103713186
KRT5	390.8212684	-2.388739291	0.314496115	-7.595449286	3.07E-14	1.36E-12
ATG101	514.1212703	-2.387668305	0.357756564	-6.674002793	2.49E-11	6.22E-10
METTL7A	3730.685305	3.234268814	1.303067157	2.482043076	0.013063148	0.034888323
FAM186A	15.52434727	-2.70064761	0.712885456	-3.788333157	0.000151661	0.000725579
AQP6	12.23783962	-2.476879818	0.797897981	-3.104256282	0.00190758	0.00668169
TMEM106C	30.21003096	2.572779414	0.53303564	4.826655518	1.39E-06	1.13E-05
AMIGO2	98.77975764	4.227480889	1.250576937	3.380424478	0.00072374	0.002862338
NELL2	75.15147555	2.810007672	0.502260164	5.594725345	2.21E-08	2.75E-07
ABCD2	15.92354835	3.317857032	0.723370842	4.586661279	4.50E-06	3.19E-05
LOC114113771	98.05896796	-2.205041967	0.348515819	-6.326949446	2.50E-10	4.95E-09
LOC101116039	217.8296208	-2.026187006	0.381094499	-5.316757426	1.06E-07	1.12E-06
MARCHF9	9.119250249	-2.571933156	0.96981297	-2.651988822	0.008001919	0.023053089
LOC101119634	6.167657055	-2.832055286	1.188747357	-2.38238619	0.017200848	0.043993125
MBD6	94.43410416	-2.842141111	0.396835492	-7.1620134	7.95E-13	2.70E-11
TRNAS-CGA	2.469184991	-4.573744892	1.892800866	-2.416389898	0.015675266	0.040684195
LOC105614781	220.5196709	-2.056699686	0.259225981	-7.93400289	2.12E-15	1.20E-13
C3H12orf73	870.0528789	-2.819882335	0.210753098	-13.38002791	7.91E-41	7.29E-38
NUAK1	2.43901732	4.930460728	1.901465364	2.59297951	0.009514844	0.026754977
CSF2RB	2.711548864	5.086751473	2.418683363	2.103107646	0.035456361	0.080033603
LOC101108380	3.255484193	-3.927053366	1.748379322	-2.246110622	0.024696923	0.059304197
LOC121819165	13.46741392	-2.208537926	0.809789567	-2.727298566	0.006385523	0.018996729
BHLHE41	25.72116197	-2.250132601	0.701235508	-3.208811556	0.001332848	0.004895366
SLCO1A2	10.00164318	2.545417495	1.056847315	2.408500697	0.016018196	0.041453925
LOC121819196	10.95440795	2.271333432	0.841475514	2.699227004	0.006950075	0.020427064
PIK3C2G	12.72018002	2.39858901	0.758295222	3.163133489	0.001560807	0.005615797
LOC121819198	33.31667326	-2.209042693	0.561716201	-3.932666865	8.40E-05	0.000432196
SMCO3	11.63597199	-2.369137228	0.788320389	-3.005297415	0.002653213	0.008915896
GPRC5D	19.11901293	-2.673791183	0.680500174	-3.929155765	8.52E-05	0.000437835
BORCS5	13883.10726	-2.332042459	0.221051775	-10.54975676	5.09E-26	1.21E-23
LOC101116641	2.680816232	5.062945306	1.873145267	2.702911191	0.006873511	0.020233702
OLR1	14.23483802	6.497952707	3.312426862	1.961689413	0.049798655	0.106203197
LOC105613004	4.996450378	3.410514957	1.709149612	1.995445532	0.045994309	0.099479514
PHC1	623.246279	-2.422095971	0.3466261	-6.987632997	2.80E-12	8.54E-11
LPCAT3	79.04384193	-2.173332527	0.362435704	-5.996463656	2.02E-09	3.22E-08
EMG1	522.2193377	-2.328517344	0.266162032	-8.748495504	2.16E-18	1.94E-16
LOC114114068	59.06258936	-2.152078256	0.445133847	-4.834676739	1.33E-06	1.09E-05
C3H12orf57	2642.086463	-2.169614921	0.228478812	-9.49591299	2.18E-21	2.99E-19
SPSB2	45.8383788	-2.513845419	0.537496572	-4.67695154	2.91E-06	2.17E-05
NOP2	276.1073939	-2.312732525	0.254987719	-9.069976128	1.19E-19	1.30E-17
LOC114114280	3.387973961	5.40397088	1.744951077	3.096918276	0.001955438	0.006834024
CD9	122.4643715	4.3679028	0.549933529	7.94260137	1.98E-15	1.12E-13
CCND2	45.87801908	-3.565646578	0.552778205	-6.450410935	1.12E-10	2.37E-09
ITFG2	8.729673048	-3.061683724	1.037763987	-2.950269774	0.003174966	0.01043211
SLC6A12	37.52557786	-2.108192907	0.482420742	-4.370029572	1.24E-05	7.85E-05
ATP6V1E1	6038.515097	-2.271363899	0.214393623	-10.59436317	3.16E-26	7.72E-24
LOC121819230	3.34192958	-5.010406195	1.816525723	-2.758235752	0.005811427	0.017550173
SYNGR1	650.2779833	-2.460475779	0.219312453	-11.21904273	3.29E-29	1.12E-26
LOC105609478	167.3873019	-2.296468729	0.33686284	-6.8172219	9.28E-12	2.52E-10
PMM1	138.4927878	-2.467357967	0.349462476	-7.060437498	1.66E-12	5.31E-11
CENPM	167.5367765	-2.171460443	0.328813259	-6.603932127	4.00E-11	9.60E-10
SEPTIN3	474.2328038	-2.392634348	0.267739071	-8.936440763	4.02E-19	3.95E-17
LOC114114089	22.19705941	-2.575453449	0.635128318	-4.055012781	5.01E-05	0.000273294
TSPO	21.16467879	2.632559733	0.791953978	3.324132216	0.000886941	0.003428362
TTLL12	145.7181675	-2.840280972	0.327325709	-8.677231556	4.06E-18	3.51E-16
PNPLA3	8.520612079	-2.20252119	0.926435304	-2.377415001	0.017434461	0.044502607
FBLN1	90.52974642	2.966299425	0.504148348	5.883782894	4.01E-09	5.95E-08
LOC121819243	30.58068424	-2.595973956	0.655621653	-3.959561039	7.51E-05	0.000390689
CDPF1	527.1722192	-2.293438256	0.313550528	-7.314413622	2.59E-13	9.73E-12
TUBGCP6	134.0575881	-2.195745646	0.324180286	-6.773223862	1.26E-11	3.33E-10
HDAC10	36.53863082	-2.423297792	0.51050697	-4.746845655	2.07E-06	1.60E-05
MIOX	13.06405754	-2.409472024	0.745207976	-3.233288024	0.001223741	0.00455128
CPT1B	5.028784475	-3.649555011	1.428630659	-2.554582591	0.01063152	0.029380234
VSTM2A	4.83529111	-3.589702379	1.476265129	-2.4316109	0.015031846	0.039269338
VWC2	9.400210862	-2.612536422	0.995766328	-2.62364407	0.008699464	0.024781332
GATAD1	101.1866694	-2.022149863	0.325800612	-6.206709827	5.41E-10	9.96E-09
LOC114114485	8.033887256	4.729317698	1.315881386	3.594030397	0.000325602	0.00142521
LOC114114483	4.602504603	4.831560937	1.635670808	2.953871227	0.003138149	0.010325594
TFPI2	26.36154728	2.66142562	0.770019984	3.456307207	0.000547631	0.002256977
PON3	12.25178275	-2.490462646	0.81341621	-3.061732252	0.002200602	0.007580793
PDK4	17.26867818	2.137437799	0.921594477	2.319282344	0.020379732	0.050627148
LOC114114599	3.050480399	4.227536425	2.015725331	2.097278017	0.035968972	0.081064012
LOC105610700	7.955006163	-2.354843346	0.950894348	-2.476451091	0.01326958	0.035349153
IL6	6.526949626	2.432165774	1.050525236	2.315190241	0.020602523	0.051045544
MALSU1	256.8394027	-2.320645793	0.275480249	-8.424000633	3.64E-17	2.65E-15
LOC101122517	32.87434309	2.271964903	0.53194976	4.271014058	1.95E-05	0.000117301
LOC114114601	8.321385577	-5.332729158	1.439348123	-3.704961346	0.000211423	0.000972825
LOC101114098	737.6331779	2.253460069	1.020993701	2.207124361	0.027305372	0.064293452
HGF	2.363272099	4.889178445	2.226007545	2.196388982	0.028064114	0.065791252
FBXL13	44.9163883	2.025830032	0.646487624	3.133594454	0.001726793	0.006124995
LOC114114604	7.012682054	2.819158259	1.043871225	2.700676283	0.006919865	0.020351015
LOC121819403	831.4552124	2.239734128	0.267784305	8.363948484	6.07E-17	4.31E-15
LOC101118100	3401.868664	-2.343467762	0.205784332	-11.38797955	4.80E-30	1.84E-27
ZMIZ2	64.73069111	-2.171280791	0.374397549	-5.799399058	6.66E-09	9.30E-08
DDX56	98.0938383	-2.331656236	0.320077628	-7.284658579	3.22E-13	1.19E-11
POLD2	291.086649	-2.12494424	0.257397861	-8.255485218	1.51E-16	1.01E-14
CCDC136	159.3299339	-2.089926958	0.36205687	-5.772372059	7.82E-09	1.07E-07
LOC114114613	115.631667	-2.545797908	0.321676376	-7.914158761	2.49E-15	1.39E-13
ADCK2	195.605336	-3.160236931	0.37276912	-8.477732637	2.30E-17	1.78E-15
LOC101110228	10.9927752	2.720002087	0.832972966	3.265414603	0.00109304	0.004119851
EPHB6	30.8059833	-2.609358654	0.56226702	-4.640781981	3.47E-06	2.53E-05
KEL	47.64014875	-2.447567344	0.593667863	-4.122789015	3.74E-05	0.000209754
LOC101103561	12.82068031	-3.157744652	0.915751097	-3.448256478	0.000564218	0.002315152
ZNF775	7.073131509	-2.151466836	1.004110746	-2.14265891	0.032140497	0.073790714
SLC4A2	58.84400564	-2.196458895	0.447181222	-4.911786955	9.03E-07	7.70E-06
SMARCD3	2.790808221	-3.682061563	1.808946066	-2.03547338	0.041803264	0.09173562
WDR86	5.278308888	-3.698370705	1.438948047	-2.570190574	0.010164258	0.028284594
HTR5A	138.3785482	-2.319658861	0.302235128	-7.675014077	1.65E-14	7.69E-13
LOC121819483	12.68672315	-3.141557488	0.881392801	-3.564310354	0.000364814	0.001576664
LOC121819716	17.74171802	-3.247067384	0.73744461	-4.403133929	1.07E-05	6.87E-05
LOC101121770	3.616330457	3.522001214	1.603074674	2.197028792	0.02801839	0.065692262
OBSCN	8.806524092	-2.084553665	0.88721803	-2.34953934	0.018796658	0.047403121
GUK1	784.7793638	-2.299590449	0.303953466	-7.565600347	3.86E-14	1.67E-12
MRPL55	881.5744877	-2.385248121	0.264985061	-9.001443739	2.23E-19	2.29E-17
LOC101104064	21.50376771	-2.748485557	0.640927206	-4.288295975	1.80E-05	0.000109381
LPAR2	225.637901	-3.283319673	0.259340411	-12.66027019	9.82E-37	6.36E-34
YJEFN3	17.03864723	-3.378484222	0.875132741	-3.860539167	0.000113137	0.00055937
LOC101106004	80.08240629	-2.098419405	0.421466694	-4.9788499	6.40E-07	5.63E-06
ARMC6	4.698469852	-4.482919245	1.580339903	-2.83668041	0.004558522	0.014242915
HOMER3	280.7233166	-2.732177031	0.304236786	-8.980429588	2.70E-19	2.71E-17
MPV17L2	198.5583398	-2.282133668	0.357840987	-6.377507748	1.80E-10	3.67E-09
MAST3	9.692081017	-4.001569288	1.110007226	-3.604993908	0.00031216	0.001372774
MVB12A	26.93036899	-2.173101833	0.54926445	-3.956385371	7.61E-05	0.00039515
USE1	1205.999055	-2.436041692	0.219233163	-11.11164781	1.10E-28	3.56E-26
LOC121819588	97.81435062	-2.141125018	0.337209099	-6.349546983	2.16E-10	4.33E-09
HSH2D	55.43760469	-2.372989608	0.395835352	-5.994890543	2.04E-09	3.25E-08
LOC101119041	8.147415435	-2.951087236	1.055230008	-2.796629373	0.005163873	0.015872845
RASAL3	13.99781335	-2.362800616	0.75234206	-3.140593545	0.001686059	0.006002049
LOC101115276	5.355479366	2.675273257	1.346549224	1.986762318	0.046948742	0.101217392
PKN1	83.34112472	-2.268996945	0.3553708	-6.384871645	1.72E-10	3.51E-09
DDX39A	318.0761253	-2.349685715	0.273841283	-8.580465621	9.45E-18	7.71E-16
LOC105610497	78.17154971	-3.915873459	0.456208834	-8.583510806	9.20E-18	7.55E-16
CC2D1A	64.97535544	-2.140172729	0.366558953	-5.838549874	5.27E-09	7.58E-08
KLF1	112.6664089	-2.084238105	0.298929775	-6.972333573	3.12E-12	9.43E-11
FBXW9	19.2177179	-2.458953504	0.764975626	-3.214420721	0.00130708	0.004825865
DHPS	419.2623882	-2.140159162	0.306936612	-6.972642158	3.11E-12	9.42E-11
LOC101111096	10.03788335	2.415271585	1.090626847	2.214571916	0.026789461	0.063316867
LOC114114822	3.670933689	3.55084538	1.524229124	2.329600795	0.01982726	0.049555591
SHFL	193.8214966	-3.036875966	0.291313556	-10.42476706	1.91E-25	4.17E-23
LOC101116228	1445.462682	-2.010108776	0.287208426	-6.998780659	2.58E-12	7.95E-11
SPC24	552.403399	-2.841999576	0.340119186	-8.355893154	6.49E-17	4.60E-15
DOCK6	79.15562645	-2.844854516	0.37842264	-7.517664686	5.58E-14	2.36E-12
SWSAP1	1048.273398	-2.043660866	0.318870604	-6.409060092	1.46E-10	3.04E-09
XAB2	852.1339068	-2.718547623	0.247855301	-10.96828518	5.43E-28	1.62E-25
LOC101122597	919.7960025	-4.005576516	0.337372688	-11.87285354	1.64E-32	7.69E-30
TRAPPC5	475.0011911	-2.273102548	0.309445465	-7.345729078	2.05E-13	7.86E-12
SH2D3A	12.96480372	-2.591025956	0.913280165	-2.837054889	0.004553178	0.014230956
LOC114114835	7.14191761	-4.18752267	1.334444714	-3.138026347	0.001700896	0.0060464
SLC25A23	17.90580925	-2.402556557	0.747948478	-3.212195263	0.001317248	0.004851007
LOC105609854	1167.425348	-2.44868888	0.271703314	-9.012362941	2.02E-19	2.12E-17
MICOS13	1175.383906	-2.676196489	0.197643373	-13.5405324	9.01E-42	8.91E-39
PLIN5	4.848322663	-4.524149743	1.556390229	-2.906822248	0.003651206	0.011808878
HDGFL2	763.3790806	-2.416211695	0.275802827	-8.760648775	1.94E-18	1.76E-16
UBXN6	442.65952	-2.44823591	0.2847709	-8.597212392	8.17E-18	6.76E-16
SHD	115.5621364	-3.169357314	0.406484715	-7.796990144	6.34E-15	3.24E-13
MAP2K2	257.086558	-2.041629559	0.327414352	-6.235614126	4.50E-10	8.42E-09
NMRK2	30.82069985	-2.762640517	0.537455626	-5.140220669	2.74E-07	2.61E-06
RAX2	8.554892698	-3.843699044	1.155257857	-3.327135168	0.000877438	0.003400027
MRPL54	1164.014123	-2.087303722	0.240145059	-8.691845391	3.57E-18	3.11E-16
TBXA2R	3.82578081	-3.227061031	1.559359767	-2.069478192	0.038501236	0.085711465
SLC39A3	52.77635135	-2.308805531	0.467202419	-4.941767076	7.74E-07	6.68E-06
LOC121819623	33.13981164	-2.292163792	0.552969816	-4.145187902	3.40E-05	0.000193147
AMH	11.03822787	-4.200432063	1.156353763	-3.632480126	0.00028071	0.001248207
LOC114114849	3.547589258	-4.050061614	1.674902581	-2.418087869	0.015602309	0.040534055
GPRIN1	10.90155938	-2.461279712	0.928660609	-2.650354378	0.008040738	0.023140549
RMND5B	152.8568088	-2.172997752	0.356251755	-6.099612761	1.06E-09	1.83E-08
NHP2	613.9744079	-2.863202839	0.279754028	-10.23471532	1.39E-24	2.68E-22
LOC121819638	9144.558549	2.032457849	0.271567978	7.484158712	7.20E-14	2.98E-12
ZNF672	12.93960397	-2.224026871	0.825013219	-2.695746952	0.0070231	0.020615877
ZNF692	33.22810967	-2.047167328	0.526036547	-3.891682697	9.96E-05	0.00050077
THEG	28.1369223	-2.686667106	0.609526269	-4.407795434	1.04E-05	6.75E-05
TPGS1	21.77797139	-2.2873247	0.686410744	-3.332297344	0.000861322	0.003343787
PALM	239.7791628	-2.121723814	0.289625176	-7.325757543	2.38E-13	9.01E-12
GPX4	8891.538104	-3.113140309	0.191811988	-16.23016545	3.09E-59	9.66E-56
NDUFS7	1365.753598	-2.376038422	0.269260944	-8.824296552	1.10E-18	1.04E-16
MBD3	82.95605054	-2.426098055	0.367032043	-6.61004428	3.84E-11	9.25E-10
LOC101119721	460.7295355	-2.28982797	0.22773786	-10.05466533	8.76E-24	1.58E-21
LOC106991156	30.69673219	-2.059608684	0.540173886	-3.81286237	0.000137367	0.000664303
LOC114114877	143.2212204	-2.287270785	0.296987104	-7.701582838	1.34E-14	6.40E-13
GFRA3	21.01860399	-3.908333713	1.011273539	-3.864764142	0.000111197	0.00055181
EIF4EBP3	30.47874406	-3.949172639	0.65617948	-6.018433611	1.76E-09	2.86E-08
NDUFA2	2733.639765	-2.487053498	0.254704065	-9.764482927	1.60E-22	2.44E-20
LOC114114886	42.61518681	2.311630776	0.507144633	4.558129235	5.16E-06	3.62E-05
FCHSD1	46.77003239	-2.197583884	0.449756618	-4.886162413	1.03E-06	8.63E-06
SH3TC2	3.866831954	-3.20346949	1.49147396	-2.14785479	0.031725293	0.073051815
IL17B	31.24970957	-2.191387741	0.502828149	-4.358124634	1.31E-05	8.23E-05
PDE6A	11.23444271	-2.158628978	0.917645736	-2.352355481	0.018654937	0.047108985
LOC114115102	17.64648143	-2.097453117	0.658264518	-3.1863378	0.001440863	0.005228312
CD74	5.331833522	3.474967308	1.644760628	2.112749569	0.034622208	0.078499858
GM2A	16.15162301	2.204214247	0.856758613	2.572736607	0.010089796	0.028102447
LOC121819663	4.752170873	-2.892910194	1.312899272	-2.203451747	0.027562924	0.064802378
LOC101111631	149.8259697	-2.501383957	0.324721589	-7.70316493	1.33E-14	6.34E-13
LOC105606740	2.379194067	4.899127699	1.987457796	2.465022256	0.013700474	0.036321827
PCSK1	139.002495	3.35209653	0.857159007	3.910705599	9.20E-05	0.000467681
LOC121819705	5.697001704	3.143213301	1.211566727	2.594337753	0.009477333	0.026669469
NPY1R	11.75550636	2.403415912	0.976601113	2.461000585	0.013855014	0.036682666
LOC121819865	14.98885895	-2.183882207	0.808966468	-2.699595465	0.006942383	0.020407651
GAR1	2432.396966	2.254112995	0.235126648	9.586803601	9.09E-22	1.33E-19
NAP1L5	5.315760404	3.041048443	1.365012068	2.227854621	0.025890211	0.061579023
SPP1	784.4427117	5.700681825	1.069981732	5.327830985	9.94E-08	1.07E-06
LOC101104829	2.277786568	4.829497097	1.949552672	2.477233452	0.013240527	0.035281167
LOC114115305	27.87322144	2.16776363	0.510335959	4.247718769	2.16E-05	0.000128412
PDGFRA	14.3837335	3.945832202	1.040598485	3.791887321	0.000149507	0.000716549
RASSF6	6.664103156	2.737679903	1.102500712	2.483154772	0.013022449	0.034814287
EREG	28.56772747	6.605256903	1.209734342	5.460088774	4.76E-08	5.59E-07
SHROOM3	1097.783835	-2.09855964	0.256896714	-8.168884703	3.11E-16	1.96E-14
LOC101112981	105.0096224	-2.172420158	0.501963981	-4.327840722	1.51E-05	9.33E-05
TMEM128	6813.898817	2.519634302	0.25175523	10.00826993	1.40E-23	2.44E-21
LOC114115250	4.2375924	3.130996517	1.395835797	2.243098023	0.024890494	0.059673107
BLOC1S4	8.410627081	2.101836589	0.904454336	2.323872532	0.020132327	0.050145223
LOC121819851	24.72238513	-2.019777325	0.539663932	-3.742657617	0.000182084	0.000853941
HTRA3	2.970228064	5.21609717	2.088946417	2.496999026	0.01252493	0.03375332
LOC114115253	10.81394381	-2.287404516	0.875112226	-2.613841344	0.00895306	0.025415051
SH3BP2	7.096831478	-3.511742502	1.244661282	-2.821444319	0.004780794	0.014828831
TNIP2	14.96895906	-2.362091643	0.720244629	-3.279568565	0.001039659	0.003944782
DGKQ	5.139693411	-2.503649316	1.232106533	-2.032007176	0.042152929	0.092405756
SLC49A3	9.478500632	-2.404044682	0.865106314	-2.778900864	0.005454317	0.016652932
LOC121819929	7.513225838	-2.274174345	1.00831011	-2.255431462	0.02410626	0.058123696
LOC105611988	25.45871058	-2.217296863	0.590754549	-3.753330158	0.000174501	0.000823517
LOC114115920	6.383407253	2.160384086	1.044581423	2.068181608	0.038622949	0.085926571
LOC114115962	2.315860808	-4.481778754	1.91555165	-2.339680454	0.019300245	0.048484282
LOC101106776	64.32600454	3.59425409	0.555546943	6.469757656	9.82E-11	2.13E-09
SLC51B	660.9337688	-2.283066819	0.329636523	-6.926012915	4.33E-12	1.28E-10
LOC121819941	8.995644552	-2.580269802	0.986527923	-2.615506101	0.008909533	0.025302966
LOC105608741	6.866875468	-3.010073355	1.119652363	-2.688399948	0.007179535	0.02102578
LOC114115565	4.281739071	-3.403699245	1.530133096	-2.224446522	0.026118417	0.062035369
INSYN1	5.073794103	-2.506890154	1.266961442	-1.978663336	0.047853924	0.102805274
LOC105608561	6.022108881	-2.447038281	1.103393074	-2.217739389	0.026572607	0.062915195
CHMP4A	126.3490917	-2.023026888	0.325553292	-6.214118976	5.16E-10	9.56E-09
RNF31	844.5751837	-2.498023543	0.292208689	-8.548765456	1.24E-17	9.98E-16
EMC9	145.312218	-3.340311101	0.319680173	-10.44891547	1.48E-25	3.31E-23
LOC442995	10.90712406	-2.245571151	0.824931064	-2.722131884	0.006486225	0.019247525
LOC121820029	19.72719058	-2.823656847	0.694242348	-4.067249506	4.76E-05	0.000260816
PRMT5	601.4530587	-2.194874556	0.218199354	-10.05903326	8.38E-24	1.54E-21
LOC101105064	484.7861382	2.826569381	0.360784499	7.834508936	4.71E-15	2.47E-13
LOC114114873	43.35240921	2.156383768	0.452461162	4.765898049	1.88E-06	1.47E-05
INAFM2	23.07218861	-2.061674785	0.60214095	-3.423907282	0.000617277	0.002498108
SPINT1	75.99360279	-2.375078016	0.375100845	-6.331838615	2.42E-10	4.81E-09
VPS18	192.1673247	-2.348969492	0.260056301	-9.032542116	1.68E-19	1.78E-17
LTK	5.39931491	-3.760849246	1.450654933	-2.592518152	0.009527615	0.02677886
PPIB	499.4411528	-2.073766791	0.238552172	-8.693137346	3.53E-18	3.09E-16
LOC121819969	9.242325854	-5.489010879	1.442250955	-3.805863923	0.00014131	0.000682139
LOC121820079	13.35225576	-3.007154123	0.840654641	-3.577157583	0.000347351	0.00150856
ZNF280D	2085.463503	2.158824312	0.202308881	10.67093202	1.39E-26	3.44E-24
CYP19	149.5627424	-2.282116547	0.276618597	-8.250047425	1.58E-16	1.05E-14
LOC114115623	23.67161719	-2.310272081	0.639947194	-3.610097993	0.000306081	0.001348251
LOC121820083	7679.010165	-2.454619594	0.271576173	-9.038420301	1.59E-19	1.71E-17
DHRS7	5.000559095	3.400698776	1.320429072	2.575449789	0.010010981	0.027921657
ZBTB1	394.2278562	2.550690934	0.289127841	8.822017698	1.12E-18	1.06E-16
GPX2	41.09099717	-2.892395337	0.523629823	-5.523740643	3.32E-08	3.99E-07
LOC114115634	17.01837424	-2.047495167	0.727414023	-2.814759	0.004881383	0.015113372
VTI1B	969.7027475	-2.022269379	0.219236567	-9.224142708	2.86E-20	3.35E-18
LOC105607009	4.52759382	5.821976264	1.691978093	3.440928868	0.000579721	0.002370637
GALNT16	21.87077839	-2.178730109	0.593095497	-3.673489546	0.00023926	0.001083916
ZFYVE1	7124.478102	-2.034612846	0.205670631	-9.892578425	4.48E-23	7.20E-21
LOC106991292	21.55373298	2.110402113	0.594590519	3.549336975	0.000386203	0.001656111
PROX2	103.9489831	-2.208876986	0.334822169	-6.59716467	4.19E-11	1.00E-09
POMT2	247.9541001	-2.438135565	0.304412767	-8.009307864	1.15E-15	6.73E-14
ISM2	2.907565153	-3.756522305	1.782804755	-2.107085643	0.035110157	0.079414421
LOC114115735	6.505358133	-2.966511392	1.151850549	-2.57543081	0.01001153	0.027921657
PATL2	2571.586955	-2.014067753	0.199329941	-10.10419078	5.29E-24	9.84E-22
RSPO3	19.01845796	-2.749247556	0.85163602	-3.228195485	0.001245738	0.004627591
PKIB	13.15750161	4.8686154	1.062986234	4.580130245	4.65E-06	3.29E-05
LOC114116063	10.03705714	-3.3040541	1.030129314	-3.207416832	0.001339328	0.00491593
LOC121820168	2.790500109	-3.691473862	1.770910629	-2.084506016	0.037114164	0.083145882
LOC105611049	5.944499692	-3.256369026	1.239214425	-2.627768819	0.00859469	0.024508898
LOC121820170	13.96618973	-2.377967408	0.732777597	-3.245142069	0.00117392	0.004388588
MANEA	9017.127886	2.141761356	0.235102803	9.109892887	8.25E-20	9.22E-18
CGA	2.637045367	-3.604638586	1.809128189	-1.992472732	0.046319214	0.100078495
LOC114116267	2.944249961	4.170239535	1.759568096	2.370035888	0.017786359	0.04524414
CCN2	6.888855387	3.084651686	1.369334763	2.252664409	0.024280317	0.058475797
VNN2	36.77740185	3.624445224	0.637406613	5.686237246	1.30E-08	1.69E-07
LOC114116239	3.429923685	-5.049893965	1.848348436	-2.732111472	0.006292985	0.018766026
SGK1	18.10510188	4.323752236	0.907077467	4.766684647	1.87E-06	1.46E-05
SF3B5	6522.176759	-2.625432666	0.208032079	-12.62032606	1.63E-36	1.02E-33
UST	16.92624721	3.256115151	0.841170082	3.870935524	0.000108418	0.000540089
LOC114116085	8.997384888	2.215082294	0.94397827	2.346539497	0.018948658	0.047728759
LOC114108725	2.039254312	-4.297429857	2.108970093	-2.037691227	0.041580822	0.091375621
LOC114116076	14.43080124	-2.913418039	0.764113057	-3.812810176	0.000137396	0.000664303
SFT2D1	25857.48653	2.053960347	0.233164236	8.809071175	1.26E-18	1.18E-16
LOC114116173	2.798424439	-3.695972021	1.859635267	-1.987471461	0.046870175	0.101071217
DACT2	4.573666585	-3.502433766	1.438309867	-2.435103761	0.01488752	0.038946482
THBS2	4.679619153	3.92068048	1.688249106	2.322335292	0.020214889	0.050297493
LOC121820386	133.3437856	-2.043650042	0.319401097	-6.398381407	1.57E-10	3.23E-09
ZNF16	106.1668859	-2.237482058	0.381423275	-5.866139283	4.46E-09	6.53E-08
LRRC24	19.91481903	-2.427248731	0.721510408	-3.364121575	0.000767877	0.003020359
RECQL4	28.34908209	-2.64259252	0.566417292	-4.665451704	3.08E-06	2.28E-05
KIFC2	7.607063295	-2.541774027	1.012300397	-2.510889095	0.012042752	0.032645995
LOC101113858	664.3973508	-2.508774541	0.297624742	-8.429321178	3.48E-17	2.54E-15
ADCK5	48.32117357	-3.145281473	0.462652773	-6.79836295	1.06E-11	2.85E-10
BOP1	50.56321642	-3.499411545	0.505886558	-6.917383927	4.60E-12	1.35E-10
SHARPIN	562.5546152	-2.693634652	0.323264295	-8.332608007	7.91E-17	5.58E-15
EXOSC4	987.7189329	-2.401085764	0.24544605	-9.782539856	1.34E-22	2.06E-20
PUF60	961.1930048	-2.13103875	0.342306202	-6.225533557	4.80E-10	8.93E-09
GFUS	137.005086	-2.236861931	0.320536684	-6.978489639	2.98E-12	9.07E-11
EEF1D	1173.558883	-2.691413429	0.275716423	-9.761527445	1.65E-22	2.49E-20
NAPRT	8.80960591	-2.549184698	1.023159309	-2.491483657	0.012721082	0.034171164
TOP1MT	10.25370652	-3.681956022	1.079263809	-3.411544046	0.000645961	0.002597954
ZNF696	140.4052249	-2.083469186	0.321336355	-6.483764298	8.95E-11	1.96E-09
GLI4	190.4267195	-2.002559177	0.421788083	-4.747785097	2.06E-06	1.59E-05
GML	150.7351129	-2.350249284	1.121761362	-2.095141948	0.036158376	0.081442004
LOC101117342	12.85431027	-2.558990325	0.769687152	-3.324714879	0.00088509	0.00342332
COL22A1	45.64103614	-2.340355755	0.437532808	-5.348983466	8.84E-08	9.72E-07
LOC121820327	1338.276846	-2.987497059	0.233884318	-12.77339622	2.31E-37	1.67E-34
LOC121820328	8.693236721	-2.760229027	0.968833998	-2.84902164	0.00438539	0.013789158
ANXA13	3.071726461	-3.840240765	1.758527693	-2.183781797	0.028978286	0.067596801
FAM83A	2.60852445	-4.653267666	1.858824665	-2.503338671	0.012302776	0.033244597
SDR16C5	1060.113279	-2.023864114	0.363889887	-5.561748723	2.67E-08	3.27E-07
LOC105609787	10.00186284	-2.115146081	0.819135103	-2.582169989	0.009818121	0.027476107
LOC101115217	5.327861299	3.016110575	1.23784184	2.436588002	0.014826561	0.038814048
LOC105616103	17.24359072	2.212974502	0.654321453	3.382090703	0.000719364	0.002848032
PI15	79.99429652	9.966082349	1.271128112	7.840344535	4.49E-15	2.38E-13
LOC106991350	8.140090849	2.405665762	1.027260993	2.341825278	0.019189696	0.048245296
TNFRSF11B	2.18129644	4.773697579	2.2695583	2.10335975	0.035434334	0.079993499
LOC114116429	25.83929848	3.556914989	0.708931428	5.017290595	5.24E-07	4.67E-06
LRP12	71.01282727	2.982945731	0.446078451	6.687042877	2.28E-11	5.71E-10
GEM	116.3107618	3.254293855	0.530947304	6.129221923	8.83E-10	1.55E-08
LOC105613866	6.402548029	2.391078847	1.156940864	2.066725207	0.038760055	0.086165065
LOC114116412	5.406478607	-2.263123216	1.143769102	-1.97865392	0.047854984	0.102805274
LOC114116684	4.25455445	-4.334012959	1.655813293	-2.617452691	0.008858877	0.025181954
LPAR6	31.03625373	3.726522449	0.587596812	6.341971864	2.27E-10	4.52E-09
LOC101106088	5.822245562	-3.245734101	1.311226806	-2.475341478	0.013310884	0.035434048
DHRS12	1171.089938	-3.091841352	0.36133076	-8.55681746	1.16E-17	9.39E-16
TRPC4	7.700582064	2.265258914	1.118651417	2.024990876	0.042868301	0.093787832
POSTN	8.587264369	6.747327186	1.431431811	4.71369096	2.43E-06	1.85E-05
LOC114116607	107.1984462	2.992029331	1.222033828	2.448401396	0.01434917	0.037790843
RFC3	6151.604024	-2.028181624	0.217693318	-9.31669215	1.20E-20	1.48E-18
LOC121820436	35.38761658	2.041856451	0.55503734	3.678773127	0.000234359	0.001065566
LOC114116612	83.1744943	-2.745467195	0.417307632	-6.579000677	4.74E-11	1.12E-09
SLC46A3	165.7601966	2.53760538	0.385411234	6.584150009	4.57E-11	1.09E-09
RASL11A	753.1067953	3.234630783	0.346468048	9.336014676	1.00E-20	1.25E-18
LOC105609570	20.1475875	-2.321535026	0.604535802	-3.840194441	0.000122937	0.000601644
LOC114116617	55.84451819	-2.175966242	0.393405245	-5.531106334	3.18E-08	3.84E-07
LOC105611673	10.38841206	2.307235774	0.823746839	2.800903947	0.005095968	0.015687229
LOC121820451	8.29365566	-2.979067518	1.06957412	-2.785283844	0.005348088	0.016364277
LOC101102249	9.0050731	2.366448658	0.941490066	2.513514208	0.011953496	0.032441502
KCTD12	27.4986686	2.912407051	0.731605732	3.98084231	6.87E-05	0.000361006
LOC114116700	4.674756173	2.440690414	1.189909922	2.051155612	0.040251795	0.088986132
LOC105610591	5.106820469	3.407902544	1.409538779	2.41774302	0.015617102	0.040555654
LOC114116640	180.3812588	-2.0308327	0.334687081	-6.067855058	1.30E-09	2.18E-08
SLC10A2	126.300233	-2.409530302	0.534280327	-4.509861545	6.49E-06	4.44E-05
MYO16	181.3173914	-2.337160263	0.450570072	-5.187118298	2.14E-07	2.10E-06
ING1	437.2732553	-2.386702573	0.382814062	-6.234626181	4.53E-10	8.46E-09
GRTP1	20.6955011	-2.567360805	0.688993346	-3.726249056	0.00019435	0.000905361
LOC114112499	4.572156113	2.775311274	1.236040382	2.245324113	0.024747333	0.059394865
C11H17orf67	10.97553122	5.212511674	1.262808726	4.127712746	3.66E-05	0.000206361
AKAP1	614.3213178	-2.267668282	0.290844135	-7.796850654	6.35E-15	3.24E-13
SUPT4H1	21.04356629	2.26977997	0.668779695	3.393912802	0.000689016	0.002744664
LOC114117129	7.712150124	-5.217723034	1.438679988	-3.626743319	0.000287018	0.001274144
CA4	31.15000094	-2.586997314	0.631471368	-4.096776899	4.19E-05	0.00023213
LOC101110524	6.136097822	-3.93238252	1.38296669	-2.843439794	0.004462944	0.013993181
LOC101114790	6.076259077	3.709281098	1.594675142	2.326041838	0.020016319	0.049902607
GAS2L2	3.210094988	-3.908039329	1.71333669	-2.280952338	0.022551267	0.054971854
NLE1	41.67538512	-2.431353351	0.457031697	-5.319879048	1.04E-07	1.11E-06
RAD51D	93.06716648	-2.697263407	0.376873908	-7.156938573	8.25E-13	2.79E-11
EVI2A	2.892318788	5.179780844	2.381900979	2.174641553	0.029656988	0.068914604
SLC13A2	64.70431536	-2.591291167	0.524889686	-4.93683003	7.94E-07	6.84E-06
LOC114117062	10.41761204	-2.389944289	0.88995972	-2.685452201	0.007243173	0.021177469
NXN	112.0914139	-2.100775259	0.33705448	-6.232746886	4.58E-10	8.55E-09
C11H17orf97	544.0410018	-3.262036716	0.251695946	-12.96022747	2.06E-38	1.54E-35
SLC43A2	191.2605127	-2.122318732	0.305031765	-6.957697439	3.46E-12	1.04E-10
SPNS3	202.2765252	-2.496065654	0.295576546	-8.444735181	3.05E-17	2.25E-15
GGT6	6.070021326	-3.315731555	1.292422245	-2.565517242	0.01030221	0.028587986
TEKT1	227.7419606	-2.274567038	0.292883529	-7.766114559	8.09E-15	4.04E-13
SLC13A5	25.18630621	-2.082473236	0.619528862	-3.361382113	0.000775535	0.00304357
ENO3	19.62901729	-2.469585096	0.621975623	-3.970549657	7.17E-05	0.000375283
CHRNE	89.02831052	-2.202159051	0.345629659	-6.371441211	1.87E-10	3.80E-09
C11H17orf107	344.2675113	-2.083965752	0.283549932	-7.349554764	1.99E-13	7.67E-12
CXCL16	6.277950677	3.771741057	1.395379985	2.703020752	0.006871246	0.020230205
MED11	362.2748757	-2.310494552	0.224044172	-10.31267421	6.18E-25	1.26E-22
LOC101114882	342.7243631	-2.479520481	0.337679264	-7.342827182	2.09E-13	8.00E-12
LOC101116157	63.29060159	-2.250687886	0.403921442	-5.572093114	2.52E-08	3.10E-07
CTDNEP1	263.9665968	-2.466606435	0.297954088	-8.278478232	1.25E-16	8.52E-15
YBX2	1934.138664	-2.835938656	0.301756415	-9.398105601	5.56E-21	7.19E-19
RPL26	2614.041935	-2.080782968	0.229884095	-9.051443795	1.41E-19	1.52E-17
CCDC42	224.1670753	-3.307765653	0.309068904	-10.7023567	9.92E-27	2.55E-24
LOC121820582	3.000123566	-4.856934995	1.869043542	-2.598620571	0.009359917	0.026386506
DHRS7C	914.8129488	-3.154813964	0.222162328	-14.20049018	9.10E-46	1.22E-42
SLC47A2	44.4160162	-2.735291815	0.453139684	-6.036310456	1.58E-09	2.59E-08
SLC47A1	1220.003381	-2.302065626	0.22154805	-10.39081872	2.73E-25	5.89E-23
LOC121820595	8.073820533	-3.738537461	1.168003135	-3.20079403	0.001370495	0.005014643
TMEM11	4816.535746	-3.534683621	0.23984805	-14.7371789	3.72E-49	5.99E-46
WFIKKN2	3.351480555	-3.973489123	1.71919615	-2.311248268	0.020819146	0.051507499
COL1A1	4.122086525	-5.311700253	1.799488029	-2.951784156	0.003159437	0.01038472
ABI3	9.425395974	-2.436318577	0.9494722	-2.565971469	0.010288729	0.028565154
HOXB13	5.928870563	-3.27904642	1.314466226	-2.494584003	0.012610487	0.033939758
LOC121820708	12.27254162	-2.3376522	0.933830048	-2.503295118	0.01230429	0.033244597
LOC105610170	46.42483243	-2.336486084	0.434802093	-5.373677182	7.71E-08	8.59E-07
LOC121820611	4.679343034	-4.477177221	1.595480386	-2.806162495	0.00501354	0.01547153
FBXO47	26.21247793	2.444609107	0.593451195	4.119309438	3.80E-05	0.000212629
KRT32	33.00220416	-2.178353257	0.601260445	-3.622977822	0.000291231	0.001291013
KRT35	4.304483094	-3.407108061	1.542042063	-2.209478031	0.027141409	0.063979585
KRT19	77.51991724	-2.005305055	0.383142875	-5.233830992	1.66E-07	1.68E-06
KRT17	2.950647131	-3.777074204	1.767277376	-2.137227724	0.032579474	0.074614177
LOC101118712	10.19963946	-3.039464472	1.096895563	-2.770969795	0.005588961	0.016995872
DHX58	329.1950338	-2.74934842	0.29600718	-9.288113961	1.57E-20	1.91E-18
HSD17B1	45.35795824	-2.798262537	0.650609772	-4.300984491	1.70E-05	0.000104075
IFI35	88.23031557	-2.069906026	0.385948537	-5.363165877	8.18E-08	9.05E-07
LOC105612017	24.23805033	-3.166153039	0.624385331	-5.070831874	3.96E-07	3.64E-06
LOC121820630	15.21260451	-2.009598864	0.699412151	-2.873268444	0.004062488	0.012923156
HEXIM2	2557.818681	-2.247528806	0.29674117	-7.5740377	3.62E-14	1.58E-12
PECAM1	12.91659636	2.436480541	0.846896172	2.87695307	0.004015353	0.012792721
LOC114116956	15.12351203	-3.177127431	0.767628092	-4.138888957	3.49E-05	0.000197808
METRNL	3.620169291	2.873303065	1.374716924	2.090105254	0.036608346	0.082159856
FN3K	23.3729796	-3.096082859	0.637781011	-4.85446071	1.21E-06	9.97E-06
LOC101110855	5.794152407	-2.409579092	1.193912041	-2.018221618	0.043568186	0.094987042
CSNK1D	429.745297	-2.144288166	0.245055486	-8.750214903	2.13E-18	1.92E-16
LOC105606262	5.422327267	-2.269827284	1.127410136	-2.013311049	0.044081917	0.095884424
LRRC45	38.69638061	-2.94214592	0.518582132	-5.673442525	1.40E-08	1.80E-07
ASPSCR1	236.596072	-2.56241979	0.440317819	-5.819477838	5.90E-09	8.39E-08
LOC121820645	6.502906389	-3.396811761	1.207139902	-2.813933791	0.004893931	0.015149725
MRPL12	404.2255442	-2.023069391	0.222194438	-9.104950627	8.63E-20	9.59E-18
OXLD1	95.66075907	-2.260856233	0.371464787	-6.086327189	1.16E-09	1.97E-08
NDUFAF8	1291.17339	-2.059202868	0.231806075	-8.883299845	6.49E-19	6.25E-17
TEPSIN	13.62204514	-2.1886317	0.711589945	-3.075692281	0.002100145	0.007277453
CEP131	156.0843822	-3.984274903	0.368107068	-10.82368486	2.66E-27	7.24E-25
LOC101121949	9.884896428	-2.318833404	1.036633193	-2.236889018	0.025293595	0.06045043
C1QTNF1	7.381727276	3.550661148	1.168052686	3.039812494	0.002367255	0.008076365
LOC105606290	66.88895993	-3.04416059	0.433203009	-7.027099365	2.11E-12	6.66E-11
MXRA7	3.075461223	3.267695997	1.655359845	1.974009461	0.048380667	0.10376838
LOC121820654	26.4336947	-2.211490158	0.527192405	-4.194844492	2.73E-05	0.000159382
ZACN	4.109121173	-3.302134759	1.519954189	-2.172522556	0.02981627	0.069224768
LOC121820660	40.71800283	-2.146531661	0.438108546	-4.899543003	9.61E-07	8.14E-06
ATP5PD	8340.780526	-2.364460126	0.271265595	-8.716402547	2.87E-18	2.56E-16
FDXR	39.87779177	-2.076944807	0.449608984	-4.619446859	3.85E-06	2.79E-05
RAB37	7.349625207	-2.46503696	0.987024335	-2.497442942	0.012509259	0.033720769
COG1	71.82470732	-2.520951834	0.368261917	-6.845540407	7.62E-12	2.14E-10
KCNJ16	9.152404133	-2.375811854	1.204963342	-1.971688077	0.048645226	0.104216776
LOC105610542	5.128078569	-2.525803913	1.184138953	-2.133030002	0.032922265	0.075263488
CACNG1	25.93002651	2.420841987	0.569107501	4.253751676	2.10E-05	0.000125739
GOLT1A	16.33238482	-2.395334554	0.694441086	-3.449298442	0.000562045	0.002307912
KLHDC8A	30.63326886	-2.236857808	0.585820947	-3.81833019	0.000134358	0.0006521
MAPKAPK2	271.8117353	-2.460002965	0.29260398	-8.407277856	4.20E-17	3.04E-15
LOC114117342	77.7135033	3.149260286	0.539316745	5.839351949	5.24E-09	7.55E-08
EPHX1	12.62976287	-2.37112889	0.78650746	-3.014757023	0.002571852	0.008679769
LOC114112547	14.30230831	2.065170002	0.687066291	3.005779833	0.002649007	0.008903357
MAP1LC3C	69.70766847	8.800794587	1.290466404	6.819855642	9.11E-12	2.48E-10
LOC114117223	53.5070389	2.89994603	0.677507101	4.280318284	1.87E-05	0.000113047
METTL13	22.90877615	-2.037427915	0.600053012	-3.395413199	0.000685251	0.002731984
PLOD1	6.159870136	-2.159952211	1.060530965	-2.036670577	0.041683065	0.091514626
MTHFR	102.774346	-2.247008153	0.333509703	-6.7374596	1.61E-11	4.17E-10
C12H1orf167	11.32616356	-2.943761106	0.86731876	-3.394093661	0.000688561	0.002743434
DRAXIN	3.094543791	-3.841166434	1.721551941	-2.231223086	0.025666356	0.061147275
LOC121816099	3.066555135	-4.885576276	1.805400605	-2.706089864	0.006808062	0.020072506
TP73	13.04209443	-2.97081548	0.844407191	-3.518226174	0.000434442	0.001839033
LOC105609715	5.672020281	-2.740376063	1.184115262	-2.314281516	0.020652285	0.051147445
PRKCZ	507.6789185	-2.275544976	0.303854823	-7.488921688	6.94E-14	2.88E-12
MMP23B	9.747861568	-3.570951596	1.023979445	-3.487327419	0.000487874	0.002038614
TAS1R3	28.41959109	-4.173628727	0.713334357	-5.850872997	4.89E-09	7.09E-08
ISG15	4.385325827	3.829376491	1.546980971	2.475386938	0.013309189	0.035434048
ASTN1	416.3063516	-2.26101742	0.264755847	-8.540009396	1.34E-17	1.07E-15
NPL	317.6678564	2.165867281	0.400606375	5.406472324	6.43E-08	7.27E-07
G0S2	24.15575935	5.353675653	0.8980879	5.961193389	2.50E-09	3.93E-08
LOC114117259	19.39872006	-2.805557027	0.702974011	-3.990982573	6.58E-05	0.000347565
ELF3	444.9874171	-2.855919581	0.231030305	-12.36166648	4.21E-35	2.26E-32
IPO9	123.9411764	-2.685931007	0.327129561	-8.210603169	2.20E-16	1.43E-14
LOC121816089	4.131030227	-3.312448935	1.482953358	-2.233683829	0.025503884	0.060829662
LOC101109728	19.72022262	-2.230869553	0.692810484	-3.220028569	0.001281778	0.004742836
LOC121816262	4514.268125	-2.035107204	0.252773603	-8.051106526	8.20E-16	4.89E-14
ACBD7	769.5195079	-2.348366632	0.261202526	-8.990596953	2.46E-19	2.50E-17
MAP3K8	15.25940355	2.963361193	0.796204882	3.721857602	0.000197763	0.000918749
LOC114117571	87.61364039	-2.274678188	0.427697868	-5.31842302	1.05E-07	1.12E-06
LOC121816323	17.06033009	-2.345617093	0.705447294	-3.32500686	0.000884164	0.003420442
LOC105609017	101.3241798	2.620509916	0.425254376	6.162217403	7.17E-10	1.29E-08
THBD	2.460967962	4.941698888	1.927813433	2.56336988	0.010366155	0.028752682
ASB13	33.45836985	-2.158514286	0.546668311	-3.948489869	7.86E-05	0.000407059
LOC101111215	807.9756488	-2.350211964	0.262957651	-8.937606324	3.98E-19	3.93E-17
LOC101104484	28.35146526	4.752226585	0.876295218	5.423088577	5.86E-08	6.69E-07
CDC25B	692.5865078	-2.108016142	0.289557497	-7.280129717	3.33E-13	1.22E-11
OXT	54.19840992	3.578232962	0.554218877	6.456353458	1.07E-10	2.30E-09
TMEM239	25.82499783	-2.248769577	0.608261284	-3.697045395	0.000218123	0.000999249
LOC114117599	8.009913595	-2.923764181	1.01666141	-2.875848491	0.004029431	0.01283057
ARFRP1	508.6810552	-2.91256835	0.2728791	-10.67347538	1.35E-26	3.39E-24
KCNQ2	38.95064482	-4.300188917	0.620994911	-6.924676582	4.37E-12	1.29E-10
PPP1R3D	414.2532083	-2.174508169	0.255290484	-8.517779958	1.63E-17	1.28E-15
ATP5F1E	7130.174647	-2.124624645	0.25072073	-8.474068524	2.37E-17	1.82E-15
LOC105606221	374.383845	-2.911424498	0.234384533	-12.42157262	2.00E-35	1.17E-32
C13H20orf85	8.30591805	-2.999175599	1.023935844	-2.929065935	0.003399823	0.011077889
CTCFL	53.43907442	2.113450469	0.444333258	4.756453478	1.97E-06	1.53E-05
TFAP2C	3.834044186	-3.226251938	1.501772288	-2.148296358	0.03169022	0.072980004
PSMF1	400.4135064	-2.224957555	0.269449347	-8.257424195	1.49E-16	1.00E-14
LOC114117514	11.9219327	-2.430685044	0.826776975	-2.939952512	0.003282626	0.010744491
LOC101102327	25.05219369	-5.44235857	1.069348742	-5.089414106	3.59E-07	3.34E-06
BCL2L1	371.1571673	-2.049753459	0.241751144	-8.4787746	2.28E-17	1.77E-15
CCM2L	7.342324206	-2.744850798	1.102084522	-2.490599172	0.01275279	0.03422983
EIF6	2335.064394	-2.562689718	0.201301289	-12.73061754	4.00E-37	2.68E-34
SCAND1	3433.629618	-2.330945677	0.244326503	-9.540289943	1.42E-21	2.03E-19
OSER1	3621.131804	-2.262816019	0.226666018	-9.983040413	1.81E-23	3.06E-21
ADA	521.8134199	-2.911318961	0.280614723	-10.3747905	3.23E-25	6.89E-23
SDC4	57.58115779	2.037324611	0.431005092	4.726915413	2.28E-06	1.75E-05
LOC105610219	426.5860934	-2.19201621	0.274920969	-7.973259425	1.55E-15	8.85E-14
LOC121816236	31.3165689	-2.029596386	0.487360044	-4.164470211	3.12E-05	0.000178991
MMP9	63.44861727	4.461897249	1.29738403	3.4391492	0.000583546	0.002383689
SULF2	988.9817719	-2.440877701	0.215265285	-11.3389286	8.42E-30	3.04E-27
VSTM2B	152.6228486	2.01541101	0.437031491	4.611592193	4.00E-06	2.88E-05
EXOSC6	384.3174984	-2.090263131	0.394779347	-5.294763125	1.19E-07	1.25E-06
LOC101115646	13.21555596	-2.184845288	0.831407804	-2.627886432	0.008591719	0.024504148
FA2H	9.553379586	-2.072094614	0.947514216	-2.186874434	0.028751692	0.067160003
LOC114112429	7.33131344	-2.129315469	1.084826974	-1.962815748	0.049667587	0.105983858
LOC114108723	143.5614822	-3.052453801	0.341467396	-8.939224763	3.92E-19	3.89E-17
LOC105609117	25.29906972	-2.12396685	0.55725225	-3.811499821	0.000138126	0.000667456
CIBAR2	10.82506191	-2.617456173	0.854612208	-3.06274138	0.002193195	0.007559438
LOC101106452	9.952229291	3.388051052	1.214075901	2.790641878	0.005260364	0.016119307
MVD	23.29464405	-2.073991357	0.566018557	-3.664175548	0.000248137	0.001117656
LOC106990291	12.49189027	-2.351694599	0.795500685	-2.956244593	0.0031141	0.01025545
LOC101117184	24.93349443	4.800900698	0.959003816	5.006133049	5.55E-07	4.93E-06
NLRC5	87.87958995	-2.004372558	0.395255914	-5.071075437	3.96E-07	3.64E-06
ADGRG1	117.690945	-2.114612098	0.31314906	-6.752733337	1.45E-11	3.78E-10
ADGRG3	2.800366303	-3.696833512	1.768627658	-2.090227129	0.036597402	0.082145112
LOC121816490	4500.754571	-2.567441315	0.213187569	-12.04310985	2.11E-33	1.02E-30
RRAD	11.77709788	-2.077777027	0.803121564	-2.587126433	0.009678007	0.027136572
B3GNT9	7.052151799	-2.165251939	1.036510456	-2.088982244	0.036709322	0.082327438
HSF4	7.733940796	-2.064201096	1.026426413	-2.011056097	0.044319532	0.096367782
NOL3	931.6027563	-2.676089475	0.300689788	-8.899834927	5.59E-19	5.41E-17
LRRC29	28.89619397	-2.003910894	0.513997244	-3.898680232	9.67E-05	0.00048914
PLEKHG4	27.1332849	-2.060203913	0.543056256	-3.793720985	0.000148406	0.000711457
LRRC36	194.9399098	-2.638134924	0.322933475	-8.169282919	3.10E-16	1.96E-14
NRN1L	162.3146181	-2.719771072	0.335902226	-8.096912924	5.64E-16	3.44E-14
SMPD3	82.11877386	-2.263511462	0.350640691	-6.455358771	1.08E-10	2.31E-09
LOC101112921	111.0740345	-2.286395833	0.328848754	-6.952727667	3.58E-12	1.07E-10
LOC114117887	511.4262195	2.059609463	0.796623877	2.585422711	0.009725968	0.027246639
U2AF1L4	1513.368641	-2.17884973	0.202828771	-10.74231094	6.44E-27	1.73E-24
HCST	9.014986707	-2.156763592	0.945402294	-2.28131834	0.022529616	0.05493587
SYNE4	29.06149083	-2.550845081	0.61806076	-4.127175264	3.67E-05	0.000206595
POLR2I	4857.225499	-2.786355886	0.209181433	-13.32028303	1.76E-40	1.51E-37
LOC106991537	7.698031358	-2.024786511	1.001297614	-2.022162526	0.043159564	0.09422745
GGN	4.321901147	-2.73975919	1.3427096	-2.040470396	0.041303497	0.090851243
RASGRP4	20.95020704	-2.298016575	0.726978997	-3.161049473	0.001572018	0.005649637
GMFG	283.2732612	-2.581928945	0.322934372	-7.995212564	1.29E-15	7.47E-14
LOC114108603	2975.439806	-2.11101133	0.197624856	-10.68191207	1.24E-26	3.14E-24
LOC114117812	7.276360795	-3.524401016	1.294095167	-2.723448093	0.006460437	0.019183125
LGALS15	25.47849026	-3.651998153	0.765318367	-4.771867902	1.83E-06	1.43E-05
TTC9B	344.0789831	-2.295429025	0.317291125	-7.234457084	4.67E-13	1.67E-11
ITPKC	12.18095758	-2.644775542	0.820428564	-3.22365122	0.001265675	0.00469144
SNRPA	1718.363615	-2.362096762	0.251796528	-9.380974324	6.54E-21	8.41E-19
AXL	9.199753235	2.09684998	0.890921231	2.353575049	0.018593854	0.046967365
TGFB1	7.867667771	-2.104279324	0.982285753	-2.142227267	0.032175198	0.073843299
EXOSC5	793.5308392	-2.231885553	0.377560596	-5.911330733	3.39E-09	5.15E-08
BCKDHA	125.3485261	-2.201703718	0.407079875	-5.408529998	6.35E-08	7.20E-07
MEGF8	12.6898341	-2.218426346	0.748840508	-2.962481759	0.003051699	0.010087098
ERF	7.590716894	2.082867016	0.982241692	2.120523934	0.033961885	0.077235834
DEDD2	181.796215	-2.190477047	0.31275733	-7.00375927	2.49E-12	7.70E-11
ZNF574	159.2897173	-3.199525089	0.316428127	-10.11138018	4.92E-24	9.24E-22
LOC114117902	3.434908903	-5.05151383	1.987647064	-2.541454124	0.011039243	0.03035509
ZNF576	103.1253284	-2.289460963	0.334930377	-6.835632481	8.16E-12	2.26E-10
SMG9	149.2358075	-2.861757582	0.340672946	-8.400307737	4.45E-17	3.22E-15
PVR	45.96361306	-2.053479361	0.47093003	-4.360476564	1.30E-05	8.16E-05
CEACAM16	5.211092751	-5.651756037	1.634278388	-3.458257834	0.000543681	0.002242803
CKM	64.84083443	-3.573478864	0.457897748	-7.804097921	5.99E-15	3.07E-13
DMWD	224.1436874	-2.370567196	0.278328602	-8.517152664	1.64E-17	1.28E-15
PNMA8A	7.422279084	-2.800468835	1.040247243	-2.692118488	0.007099972	0.020815498
CALM3	1350.16503	-2.993713291	0.265697611	-11.26737001	1.90E-29	6.74E-27
GNG8	7.87993226	-2.308615865	0.948986231	-2.432717977	0.014985968	0.039171285
CABP5	4.940251003	-2.929203237	1.297203281	-2.258091141	0.023939978	0.057811845
EMP3	8.667747011	2.142838495	0.899380294	2.382572209	0.01719216	0.043976894
CYTH2	372.8220284	-2.765484392	0.335450019	-8.244102648	1.66E-16	1.10E-14
TRPM4	9.818363291	-2.029013113	0.951188896	-2.133133726	0.032913758	0.075253202
SLC6A16	3.259070462	-3.919808843	1.710192881	-2.292027342	0.021904065	0.053640394
LOC101114209	281.9287853	-2.238820014	0.297245761	-7.53188206	5.00E-14	2.14E-12
IL4I1	18.29195212	-2.839326854	0.70250882	-4.041695666	5.31E-05	0.00028692
MYBPC2	226.0942258	-2.113010761	0.298094158	-7.088400436	1.36E-12	4.40E-11
FAM71E1	303.8507594	-3.610297151	0.261809544	-13.78978434	2.94E-43	3.45E-40
KLK15	8.341512557	-4.419991562	1.284273342	-3.441628366	0.000578224	0.002365038
LOC101113472	185.5862563	2.140429072	0.321356003	6.660616424	2.73E-11	6.76E-10
LOC114108745	2945.519589	2.070727715	0.218418586	9.480547223	2.53E-21	3.42E-19
SIGLECL1	110.9408784	-2.123912859	0.402979855	-5.270518693	1.36E-07	1.40E-06
LOC105601982	4.747203415	-3.497684277	1.469350275	-2.380429184	0.017292484	0.044209431
LOC121816382	2.333859818	-4.492131925	2.235301865	-2.009631002	0.044470258	0.096628384
ZNF579	5.417464053	-2.619674471	1.198676314	-2.185472791	0.028854199	0.067342131
DNAAF3	9.389132083	-3.149511854	0.972366246	-3.239018082	0.00119942	0.004474117
TNNI3	103.6405415	-2.375565789	0.544285908	-4.364555013	1.27E-05	8.03E-05
LOC101102259	9472.657026	-2.661023647	0.257809312	-10.3216739	5.62E-25	1.16E-22
CDC42EP5	5.023679351	-3.588540403	1.447348466	-2.47938937	0.013160755	0.035109058
LENG1	375.5874925	-2.872181517	0.303790277	-9.454487969	3.25E-21	4.32E-19
NLRP13	3187.529178	-2.184572421	0.235440106	-9.278675834	1.72E-20	2.05E-18
SMIM17	195.8874577	-2.27328928	0.386834505	-5.876645574	4.19E-09	6.19E-08
LOC101108414	86.91200633	-2.228950874	0.376258354	-5.923990387	3.14E-09	4.80E-08
LOC121816451	124.648101	-2.425358265	1.049984916	-2.309898198	0.020893791	0.051637281
CHMP2A	4214.789444	-2.111270171	0.208425659	-10.12960777	4.08E-24	7.74E-22
LOC114118104	12.69158144	-2.092924216	0.789107458	-2.652267692	0.007995313	0.023037591
LOC101117272	7.214443548	3.499976721	1.264977281	2.766829707	0.005660431	0.017168726
MMP13	88.83127636	3.88342702	0.423102582	9.178452665	4.37E-20	5.01E-18
MMP12	286.185249	11.804912	2.643585532	4.465492742	7.99E-06	5.34E-05
MMP1	196.7349355	11.26348493	1.218308263	9.245184711	2.35E-20	2.77E-18
LOC114118360	9.162943729	3.254641425	1.008090197	3.228522047	0.001244317	0.004623225
LOC101122624	2.155478984	-4.379256133	2.010737985	-2.177934751	0.029410895	0.068461359
COLCA2	7.193001448	2.368643226	0.975948336	2.427017022	0.015223542	0.039709357
BCO2	50.43373715	2.354931843	0.739359848	3.185095662	0.001447062	0.005249792
LOC106991616	25.62376201	-2.176734085	0.576907775	-3.773105821	0.000161228	0.000766465
RBM7	2202.726232	2.146419339	0.243927093	8.799429829	1.38E-18	1.28E-16
LOC121816627	69.03334013	-2.2109645	0.493903909	-4.476507388	7.59E-06	5.10E-05
LOC121816628	14.49837386	-3.875199482	0.995289777	-3.89353892	9.88E-05	0.000497886
TTC36	8.910220635	-2.082499308	0.891917045	-2.33485762	0.01955086	0.049002409
LOC114118397	35.12666699	-3.068555503	0.519221849	-5.909912126	3.42E-09	5.18E-08
CCDC153	897.0020678	-2.765555901	0.275532123	-10.03714511	1.05E-23	1.87E-21
THY1	9.737137318	-2.107737086	1.016469966	-2.073585207	0.03811785	0.085006286
GRAMD1B	142.6519654	-2.099462908	0.310131339	-6.769592892	1.29E-11	3.40E-10
SERGEF	85.82110212	-2.294470718	0.380182145	-6.03518799	1.59E-09	2.60E-08
KCNJ11	8.2620932	-2.405605024	0.91887178	-2.617998588	0.008844717	0.025145511
LOC114118256	21.28602957	2.089589786	0.602072843	3.470659421	0.000519182	0.002154519
ADM	222.6925425	2.084905988	0.439780437	4.740788384	2.13E-06	1.64E-05
SCUBE2	10.83023143	-3.094220315	0.899842472	-3.438624438	0.000584678	0.002386458
MRPL17	2739.572	-2.9696084	0.180490168	-16.45302029	7.98E-61	3.00E-57
LOC101105185	9.989333617	6.960972369	1.454246719	4.786651589	1.70E-06	1.34E-05
LRRC51	928.7681968	-2.079740742	0.197905853	-10.50873792	7.87E-26	1.85E-23
STARD10	261.6327007	-2.205661028	0.32885669	-6.707058415	1.99E-11	5.05E-10
ATG16L2	9.188756529	-2.853043838	0.942088437	-3.028424644	0.002458324	0.008344614
MRPL48	630.0876803	-2.489032025	0.200798607	-12.39566379	2.76E-35	1.57E-32
TPBGL	413.1045323	-3.031026028	0.269888509	-11.23065981	2.88E-29	1.00E-26
CAPN5	11.08064607	-2.144190543	0.849849345	-2.523024292	0.011635036	0.031723931
LIN7C	13961.98449	2.008012408	0.211099092	9.512179254	1.87E-21	2.58E-19
CD44	14.34840372	7.488244773	1.341143368	5.583478212	2.36E-08	2.92E-07
ACCS	33.46959554	-3.14411258	0.540530505	-5.816716264	6.00E-09	8.51E-08
CRY2	37.36836349	-2.208279591	0.564467469	-3.912146783	9.15E-05	0.000465402
MYBPC3	17.89150263	-2.686664099	0.695103385	-3.865128778	0.000111031	0.000551278
PTPMT1	1133.71377	-2.268294212	0.272756487	-8.316187948	9.08E-17	6.34E-15
LOC101121037	66.194921	3.065888946	1.290044044	2.376576954	0.017474116	0.044588796
LOC114118544	7.89268582	2.308980868	1.176940626	1.961849916	0.04977996	0.106189756
LOC121816636	7.509254237	2.692096316	1.046698311	2.571988785	0.010111617	0.028154795
LOC101110450	2.175267765	4.770351988	2.219319471	2.149466109	0.03159747	0.072819991
AK6	1378.22626	-2.128756402	0.292942647	-7.266802636	3.68E-13	1.33E-11
ANKRD55	7.263236936	3.160803038	1.089955432	2.899937874	0.003732366	0.012034744
LOC101117107	13.14709805	2.324215961	0.780167531	2.979124187	0.002890736	0.009609534
FST	581.3090496	-3.218349765	0.942783533	-3.413667775	0.000640947	0.002581328
DAB2	81.43867058	3.959270339	0.481947829	8.215143014	2.12E-16	1.39E-14
AMACR	107.8981557	2.15002785	0.452250984	4.754058979	1.99E-06	1.55E-05
RXFP3	5.995859426	3.653513092	1.566960461	2.331592393	0.019722144	0.049339519
CDH6	170.4843279	5.034636376	0.845566581	5.954157235	2.61E-09	4.08E-08
CDH10	9.328470455	2.261905753	0.919768243	2.459212711	0.013924209	0.036826591
LOC114118748	8.109608386	2.191833716	0.952665892	2.300737053	0.021406498	0.052648491
LOC101118900	7.156128185	2.172894203	0.955486886	2.274122476	0.022958624	0.055793585
ZNF622	1060.736374	-2.266700588	0.253906672	-8.927298257	4.37E-19	4.27E-17
LOC114118753	3.845368679	-4.172756987	1.658277643	-2.516319873	0.01185875	0.032230946
ANKRD33B	7.682283394	-2.295433604	1.019423006	-2.251698844	0.02434131	0.058585425
C16H5orf49	3.228767473	-3.907182033	1.714903886	-2.27836794	0.022704665	0.055276572
UBE2QL1	9.333098291	-2.173944842	0.982938589	-2.21167921	0.026988838	0.063675889
MRPL36	929.5110579	-3.096858867	0.341523102	-9.067787346	1.21E-19	1.32E-17
SDHA	283.7149957	-2.233403867	0.288575299	-7.739414543	9.99E-15	4.86E-13
LOC114108783	92.38404475	-2.945266246	0.375540585	-7.842737542	4.41E-15	2.35E-13
LOC121817001	15.22397208	-2.382906713	0.715552712	-3.330162367	0.000867954	0.003366054
LOC121816918	3.324317777	3.36765611	1.715041237	1.963600663	0.049576421	0.105837429
UCP1	13.09099312	2.001254982	0.937436216	2.134817227	0.032775943	0.074974619
MGST2	5141.993868	-2.4574464	0.245409761	-10.01364569	1.33E-23	2.33E-21
LOC105602786	25.64231204	-2.747195389	0.663750496	-4.138897679	3.49E-05	0.000197808
LOC101110539	4.618274339	3.275041493	1.344502633	2.435875849	0.014855782	0.03886887
LOC105604278	37.93390138	2.902747933	0.573851517	5.058360649	4.23E-07	3.87E-06
CCDC92	206.8716171	-2.731796896	0.32268347	-8.465871826	2.54E-17	1.94E-15
GTF2H3	2450.464244	2.326478579	0.263426633	8.831599728	1.03E-18	9.79E-17
RILPL1	68.60824301	-2.453443345	0.415234106	-5.90857858	3.45E-09	5.21E-08
HIP1R	415.7329133	-2.080426385	0.313764289	-6.630539099	3.34E-11	8.12E-10
LOC121816947	90.72771483	-2.060932095	0.390495217	-5.277739669	1.31E-07	1.35E-06
LOC105602892	23.10544379	-2.883007912	0.709394041	-4.064043033	4.82E-05	0.000264272
SDSL	11.01623409	-2.845113799	0.950754454	-2.992480115	0.002767207	0.009241083
LOC105602911	7.511538274	3.587808327	1.12115864	3.200089798	0.001373848	0.005025933
LOC121816870	19.03664339	-2.295178036	0.656711479	-3.494956473	0.000474139	0.001987362
LOC121816872	18.6916436	-2.097911604	0.624792518	-3.357773249	0.00078573	0.003080903
LOC101120864	5.413745411	-4.695428271	1.550868298	-3.027612516	0.002464939	0.008361024
FOXN4	23.15230563	-2.298523527	0.635996793	-3.614048928	0.000301452	0.001329732
TMEM119	20.87860414	-3.678583714	0.745678158	-4.933205664	8.09E-07	6.95E-06
LOC121816973	5.745575693	-2.347865683	1.15329317	-2.035792585	0.041771187	0.091686658
LOC121816974	36.4632884	-3.214331895	0.600542787	-5.35237782	8.68E-08	9.56E-07
RASL10A	21.11340742	-2.02268922	0.599905963	-3.371677135	0.00074712	0.002947975
ZMAT5	155.400134	-2.79931962	0.333439816	-8.395277016	4.65E-17	3.34E-15
LOC121816981	208.7593449	-2.905935472	0.278215575	-10.44490579	1.55E-25	3.42E-23
OSBP2	73.84716904	-2.389366411	0.351645209	-6.794821447	1.08E-11	2.91E-10
LOC121816885	6.976655174	-3.509259587	1.226738383	-2.8606422	0.004227839	0.013367631
SUSD2	28.24904895	-4.158758888	0.684691309	-6.073918034	1.25E-09	2.10E-08
ADORA2A	3.505906229	-4.041626932	1.66913123	-2.42139555	0.015461044	0.040250586
TOP3B	27.01728949	-2.01575686	0.672553731	-2.997168505	0.002725	0.009124475
LOC114118901	19.01356173	-2.033085204	0.683550334	-2.974302114	0.002936558	0.009740803
UBE2L3	7617.264395	-2.493679571	0.191118817	-13.04779722	6.54E-39	5.34E-36
LZTR1	42.4338166	-2.450220444	0.468423848	-5.230776479	1.69E-07	1.71E-06
SMPD4	528.5142764	-2.184532955	0.251277303	-8.693713779	3.51E-18	3.09E-16
SCARF2	9.890439408	-2.710078172	0.913408512	-2.966994655	0.003007262	0.0099595
TSSK2	3.979153689	-4.231910588	1.644807577	-2.572890986	0.010085297	0.028098176
MRPL40	1067.204752	-2.271601948	0.287981769	-7.888006091	3.07E-15	1.68E-13
C17H22orf39	1180.69517	-2.517090189	0.321318647	-7.833626254	4.74E-15	2.48E-13
DGCR8	1093.645849	-2.350080441	0.302268379	-7.774814049	7.56E-15	3.80E-13
ZDHHC8	35.53802098	-2.256386314	0.505462868	-4.464000144	8.04E-06	5.37E-05
GABRB3	290.1802923	-2.034553597	0.289861616	-7.019051446	2.23E-12	6.99E-11
LOC105603042	6.394606047	-3.37048745	1.226159606	-2.74881625	0.005981091	0.017978697
DET1	304.6391999	-2.161252727	0.266267698	-8.116841587	4.78E-16	2.94E-14
LOC101102268	3.331828583	-5.00643025	1.848509979	-2.708359872	0.006761666	0.019967064
MFGE8	179.2119571	2.18315624	0.283070581	7.712409496	1.23E-14	5.93E-13
RHCG	93.99223481	3.074264904	0.430968298	7.133389896	9.79E-13	3.24E-11
LOC105612928	264.7601489	-2.368498422	0.462112854	-5.125367975	2.97E-07	2.81E-06
LOC121817086	16.23621382	-2.274913813	0.705446892	-3.224783947	0.001260678	0.004675687
CTSH	12.15393863	7.250110693	1.429305964	5.072469348	3.93E-07	3.61E-06
LOC105603125	478.2021416	-2.414284718	0.318606617	-7.577635196	3.52E-14	1.55E-12
ACSBG1	19.10390459	-5.652059268	1.233070437	-4.583727821	4.57E-06	3.24E-05
LOC121817099	2.799395371	-3.696380846	1.789129178	-2.066022337	0.038826371	0.086292057
PSTPIP1	615.2289657	-2.187699321	0.263548468	-8.300937354	1.03E-16	7.13E-15
COMMD4	1186.055336	-2.902546299	0.255866834	-11.34397239	7.95E-30	2.93E-27
LOC105603153	9.291083322	-2.394608012	0.88788957	-2.696966034	0.006997441	0.020553409
C18H15orf39	41.71893972	-2.226785751	0.562723183	-3.957160143	7.58E-05	0.00039436
MPI	27.08861013	-2.260199549	0.539254403	-4.19134185	2.77E-05	0.000161618
CYP11A1	30.65823252	2.354454434	0.824790454	2.85460922	0.004308981	0.01358302
STRA6	27.05287016	2.381544172	0.636252844	3.743078232	0.00018178	0.000853364
LOC114109063	16.42359468	2.495232009	0.662427129	3.766802266	0.000165352	0.000784283
LOC121817112	10.4763583	-3.037133874	0.940188464	-3.230345818	0.001236406	0.004594741
LOC105603209	7.212258545	-2.447230369	1.086838297	-2.251696849	0.024341436	0.058585425
LOC780772	165.7611518	2.349270679	0.428417207	5.48360486	4.17E-08	4.93E-07
LOC121817116	8.515194906	6.73077792	1.604556855	4.194789296	2.73E-05	0.000159382
OTUB2	85.00483794	-2.576545602	0.406641216	-6.336164408	2.36E-10	4.69E-09
LOC101116867	36.0814949	-2.687542026	0.559797386	-4.800919214	1.58E-06	1.26E-05
LOC101117112	8.980254136	-2.107357297	0.892484992	-2.361224353	0.018214707	0.046189841
LOC105603226	3.133283262	4.261338657	1.738120588	2.451693332	0.014218578	0.03751531
SERPINA1	16.00893644	5.751061976	1.255660565	4.580108778	4.65E-06	3.29E-05
LOC105603227	2.138506459	4.735783466	2.246435264	2.108132623	0.035019519	0.079238045
SERPINA14	1173.482799	10.66229129	0.711262598	14.99065368	8.45E-51	1.59E-47
LOC101111083	268.7594199	-3.919386669	0.395494218	-9.910098519	3.76E-23	6.09E-21
LOC105614179	258.506089	-3.285937026	0.288727456	-11.38075703	5.21E-30	1.96E-27
GSC	8.615400607	-2.059004329	0.896606531	-2.296441368	0.021650658	0.05315153
LOC105601897	899.3266692	-2.459529684	0.279848655	-8.788785089	1.51E-18	1.40E-16
LOC105605761	16.81867882	-2.11099353	0.666731943	-3.166180282	0.00154455	0.005564767
LOC114109086	12.54447662	-2.182053288	0.835855594	-2.610562524	0.009039345	0.025621255
TEDC1	5.815384682	-2.738380255	1.181035376	-2.318626784	0.020415282	0.050688636
CMC1	55.62603538	2.033144222	0.430505464	4.722690863	2.33E-06	1.78E-05
PLCD1	65.59782522	-2.850754449	0.464733095	-6.13417568	8.56E-10	1.51E-08
ACAA1	355.7853202	-3.223863533	0.337501364	-9.552149636	1.27E-21	1.83E-19
LOC105603392	2.039604861	4.674546203	2.111039731	2.214333598	0.026805839	0.063320982
LOC105603426	578.734768	-2.538515292	0.219660498	-11.55653981	6.84E-31	2.99E-28
LOC101111055	134.4379398	2.127732821	0.938009298	2.268349391	0.02330792	0.056518094
LOC105603449	2.453733553	4.93826619	2.15506243	2.291472452	0.021936103	0.053697842
LOC121817236	59.65730219	-2.371648577	0.427939899	-5.542013213	2.99E-08	3.64E-07
ARF4	9894.905299	2.085471841	0.230815814	9.035220802	1.64E-19	1.75E-17
CHDH	175.3736621	-2.725566724	0.287831529	-9.469312589	2.82E-21	3.78E-19
MUSTN1	2.805380108	5.132951914	1.878485458	2.732494889	0.006285665	0.018747175
SMIM4	252.2701258	-2.432810551	0.259923661	-9.359711773	8.00E-21	1.01E-18
NT5DC2	705.4075564	-2.468267564	0.222506292	-11.09302365	1.36E-28	4.24E-26
STAB1	21.07484131	-3.527145979	0.694334662	-5.079893271	3.78E-07	3.49E-06
TNNC1	33.31679739	-2.348339672	0.541287435	-4.338433739	1.44E-05	8.94E-05
GLYCTK	3.892099217	-5.231380415	1.674681613	-3.123805966	0.001785281	0.006302691
LOC121817246	19.89755085	-2.045609225	0.644047641	-3.176176879	0.001492299	0.005395148
TEX264	210.3934285	-2.154480717	0.361234991	-5.964208257	2.46E-09	3.86E-08
TMEM115	141.1012519	-2.034669607	0.38131344	-5.335950406	9.50E-08	1.03E-06
RASSF1	2.908536084	-3.756942567	1.796622101	-2.091114522	0.036517799	0.08203508
HYAL3	6.965097326	-2.413035918	1.120154767	-2.154198679	0.031224594	0.072075653
MST1	18.98457166	-2.057886766	0.694321727	-2.963880702	0.00303786	0.010050305
C19H3orf84	1676.86995	-2.236817375	0.217211085	-10.29789695	7.20E-25	1.45E-22
KLHDC8B	27.32922681	-2.500943286	0.572276249	-4.370167888	1.24E-05	7.85E-05
LOC101106719	38.61507752	-2.112909794	0.475888327	-4.439927761	9.00E-06	5.92E-05
CATHL3	5.359099099	-3.113213729	1.293772732	-2.406306496	0.016114739	0.041669314
CCDC12	320.6876608	-2.036287588	0.258091408	-7.889792242	3.03E-15	1.66E-13
PTH1R	2.474300769	-4.57639955	1.892273507	-2.418466217	0.015586093	0.04049753
HRH1	488.8666455	-2.085201759	0.262874233	-7.932317059	2.15E-15	1.21E-13
MRPS25	2688.09591	-2.453300991	0.198885213	-12.33526092	5.85E-35	2.89E-32
LSM3	10350.55438	-2.237492233	0.223905541	-9.993018599	1.64E-23	2.79E-21
ACAD9	51.78509995	-2.28338484	0.406393166	-5.618659537	1.92E-08	2.43E-07
LOC121817305	7.748273409	-2.83523189	1.049456987	-2.701618003	0.006900299	0.020306192
CHCHD6	375.5372812	-2.226815319	0.294496912	-7.561421625	3.99E-14	1.72E-12
C19H3orf22	3.394134515	-3.98279647	1.736023982	-2.294205905	0.021778674	0.053389027
TINAG	14.87237812	-3.15143101	0.82097607	-3.838639303	0.000123718	0.000605152
LOC101118647	3822.741937	-2.273769546	0.247663357	-9.180888013	4.28E-20	4.93E-18
LOC101122987	6.326530072	-3.378377524	1.227292356	-2.752708031	0.005910458	0.017789162
PNPLA1	7.705375802	-2.070793927	0.960713206	-2.155475655	0.031124632	0.071889094
SAYSD1	277.3364438	-2.340424641	0.311630283	-7.510260619	5.90E-14	2.48E-12
LRFN2	15.1360684	-2.137021157	0.717800296	-2.977180655	0.002909125	0.009663463
TREM1	2.903075972	5.176249227	1.870424457	2.76741956	0.005650199	0.01715125
LOC101108346	216.8781011	-3.03463864	0.315505646	-9.618333863	6.69E-22	9.89E-20
GNMT	314.1071779	-2.866373446	0.35580867	-8.055940428	7.89E-16	4.72E-14
MRPL2	995.6811517	-2.152891865	0.295661765	-7.281603915	3.30E-13	1.21E-11
LRRC73	53.31549836	-2.695457885	0.447952193	-6.017289175	1.77E-09	2.88E-08
LOC121817411	7.507624684	-3.642811608	1.211576008	-3.006671957	0.002641246	0.008880451
VEGFA	98.38158404	-3.679095934	0.5378981	-6.839763769	7.93E-12	2.20E-10
MRPL14	1129.898143	-2.665111691	0.238935157	-11.15412114	6.84E-29	2.25E-26
NFKBIE	273.0791369	-2.287152503	0.254866949	-8.97390781	2.86E-19	2.86E-17
SPATS1	27.56151395	-2.170763884	0.542141844	-4.004051533	6.23E-05	0.000330763
GLYATL3	8.085792315	2.803640361	0.952830405	2.942433771	0.003256434	0.010669922
LOC101106720	7.157183266	3.143602323	1.173854994	2.678015886	0.007405971	0.02158791
CCHCR1	159.3940932	-2.580013407	0.389078773	-6.631082414	3.33E-11	8.11E-10
LOC101109651	3.672505323	-4.11114233	1.723386983	-2.385501556	0.01705585	0.043684028
SFTA2	42.50186208	-3.059365684	0.516045614	-5.928479196	3.06E-09	4.69E-08
FLOT1	252.613199	-2.079876026	0.274045902	-7.589516985	3.21E-14	1.42E-12
LOC114109649	35.40232499	-3.34291582	0.583231773	-5.731710749	9.94E-09	1.32E-07
LOC101111496	412.2416338	-2.507903392	0.301557585	-8.316499117	9.06E-17	6.34E-15
LOC105603785	15.32514086	3.230115469	1.110588182	2.908472755	0.003631988	0.011754822
ZSCAN16	29.40715614	-2.688449871	0.686130138	-3.918279816	8.92E-05	0.000455306
LOC114109700	7.141997348	-2.735085642	1.097657748	-2.491747221	0.012711647	0.034153571
LOC101110974	3.487671038	4.416959134	1.822923843	2.423008043	0.015392586	0.040100163
HFE	7.358323707	-2.804433663	1.146159438	-2.44680938	0.014412704	0.037936888
LOC101112606	21.05845875	-2.139810656	0.71096683	-3.009719391	0.002614892	0.008801296
SLC17A2	44.3250073	2.290288195	0.522890577	4.380052535	1.19E-05	7.54E-05
RBM24	89.85367198	3.82705372	0.474307063	8.068725969	7.10E-16	4.26E-14
GMPR	1342.351095	-2.363181956	0.344632677	-6.857103558	7.03E-12	2.00E-10
CD83	4.770692897	5.90214475	1.656429367	3.563173213	0.000366399	0.001583119
EDN1	3.074294447	5.268562166	2.153381206	2.446646303	0.014419226	0.037948736
NEDD9	51.41093023	-2.05940907	0.633709043	-3.249770686	0.001154981	0.004324673
GCM2	10.47038049	2.171569317	0.842808362	2.576587295	0.009978101	0.027853244
LOC105603901	37.34726018	-2.227571753	0.464474253	-4.795899319	1.62E-06	1.29E-05
C20H6orf201	3.369077864	-3.972739858	1.698178254	-2.339412749	0.019314082	0.048499577
LOC105603906	12.96674558	-2.591192275	0.910785298	-2.845008897	0.004441018	0.01393607
LOC121817394	10.82837786	-2.255882377	0.805304948	-2.801277185	0.005090078	0.015674234
LOC105604164	4329.652709	2.135079292	0.292792333	7.292128405	3.05E-13	1.13E-11
LOC114110158	2.938708514	-3.771029854	1.775463938	-2.123968712	0.03367276	0.076717676
ME3	143.598	-2.831615875	0.298500688	-9.48612847	2.40E-21	3.26E-19
LOC121817497	186.2408214	-2.03753979	0.808383708	-2.520510705	0.011718467	0.031895837
AAMDC	779.4680923	-2.678204385	0.341633176	-7.83941541	4.53E-15	2.39E-13
LOC121817469	82.0523192	-2.135422336	0.387038605	-5.517336787	3.44E-08	4.13E-07
LOC121817538	173.290045	-2.313358507	0.264017765	-8.762131989	1.92E-18	1.75E-16
CSRP3	78.9846398	7.499448192	0.931957914	8.046981607	8.49E-16	5.04E-14
LOC101120613	24.67016521	-2.383440659	0.565461029	-4.215039656	2.50E-05	0.000147007
VWA5A	14.26599885	2.1640553	0.74820054	2.892346614	0.003823758	0.012278135
HYLS1	6181.88409	2.381427322	0.27718636	8.591430418	8.59E-18	7.07E-16
SPATA19	8.806748241	-2.11367315	1.016988659	-2.078364524	0.037675798	0.084193279
MS4A8	16.76994839	2.854039152	1.091957964	2.61368958	0.008957038	0.025422499
LOC106990353	43.85142119	-3.176163415	0.521183703	-6.094134168	1.10E-09	1.89E-08
FADS2	12.16730728	-2.633068838	0.91218932	-2.886537673	0.003895061	0.012458092
POLR2G	5530.000365	-2.463826642	0.199597861	-12.34395315	5.25E-35	2.67E-32
OTUB1	7101.542139	-2.705397018	0.212134956	-12.75318818	2.99E-37	2.08E-34
NUDT22	244.3332853	-2.087767367	0.31031114	-6.727980711	1.72E-11	4.43E-10
FKBP2	689.2106736	-2.87265335	0.342550131	-8.38608159	5.03E-17	3.59E-15
EHD1	742.1880287	-3.143134804	0.272271127	-11.54413556	7.90E-31	3.37E-28
NAALADL1	16.05568726	-2.262842312	0.709992169	-3.187137	0.001436887	0.005216913
TM7SF2	24.8470524	-2.855735129	0.646314302	-4.418492864	9.94E-06	6.45E-05
LTBP3	16.99011009	-2.418771734	0.796574444	-3.036466653	0.002393686	0.008156166
ZNRD2	2437.611421	-3.398300097	0.274204613	-12.39330025	2.84E-35	1.57E-32
LOC105604114	3.32393057	-5.003358906	1.732301258	-2.888272975	0.003873635	0.012408585
C21H11orf68	54.64233872	-2.672175058	0.452498379	-5.905380394	3.52E-09	5.29E-08
EIF1AD	428.3081502	-2.472634378	0.347802592	-7.109304049	1.17E-12	3.80E-11
YIF1A	691.698448	-3.581976004	0.21689198	-16.51502285	2.86E-61	1.34E-57
ACTN3	2.587351526	-4.642717289	1.882468428	-2.466292247	0.01365199	0.036198399
RHOD	117.8341682	-2.884722885	0.401298943	-7.188463698	6.55E-13	2.27E-11
LOC101119685	97.51688024	-2.009340792	0.481819469	-4.170318803	3.04E-05	0.0001751
ALDH3B1	84.28919384	-2.045228659	0.420629988	-4.862298731	1.16E-06	9.64E-06
MRPL23	1041.841532	-2.118667288	0.190954112	-11.09516453	1.32E-28	4.21E-26
POLR2L	1206.477247	-2.676958179	0.23391021	-11.44438365	2.51E-30	1.00E-27
RPLP2	4316.020546	-2.201027858	0.199989547	-11.00571449	3.59E-28	1.09E-25
PIDD1	4.181825559	-2.683054619	1.310585632	-2.047218093	0.040636676	0.08965756
HRAS	118.734684	-3.6155583	0.348811417	-10.36536685	3.56E-25	7.52E-23
B4GALNT4	65.15958164	-2.347059012	0.382951036	-6.128874952	8.85E-10	1.55E-08
LOC114110140	2.561075296	4.994574093	2.164215584	2.307798784	0.021010331	0.051864334
LOC101104703	16.96141524	-3.186352028	0.772209468	-4.126279411	3.69E-05	0.000207215
LOC106991852	9.158799692	-3.155866016	1.046256879	-3.016339563	0.002558466	0.008640804
TLL2	112.2852873	-3.638532262	1.083738818	-3.357388516	0.000786825	0.003083262
EXOSC1	1616.509949	-2.4279253	0.221473722	-10.9625886	5.78E-28	1.70E-25
ZDHHC16	94.77896139	-2.491715667	0.37877322	-6.578383941	4.76E-11	1.12E-09
PYROXD2	4.876553229	-4.531975397	1.585983011	-2.857518249	0.004269681	0.013486302
SLC25A28	101.7181588	-2.692451895	0.39856063	-6.75543867	1.42E-11	3.72E-10
PAX2	26.64324666	-2.092240105	0.519345984	-4.028605531	5.61E-05	0.000301469
DPCD	4169.235449	-2.653604366	0.229099888	-11.58273971	5.04E-31	2.25E-28
FGF8	5.220147803	-4.642525722	1.555374319	-2.984828582	0.002837373	0.009456902
HPS6	8.980010414	-2.534811223	0.911593768	-2.780636848	0.005425239	0.016578541
NFKB2	237.3535371	-2.154906319	0.369728844	-5.828342454	5.60E-09	7.99E-08
LOC114110310	115.5887689	-2.299341062	0.33967728	-6.769192988	1.30E-11	3.41E-10
HTRA1	16.53915701	2.322713727	0.712419908	3.260315581	0.001112883	0.004187081
FAM24A	25.03606159	-2.514824898	0.564206016	-4.457281254	8.30E-06	5.52E-05
LOC114110265	5.052091872	3.409670441	1.425820267	2.391374649	0.016785415	0.043142146
CHST15	12.77989779	2.076173093	0.868800705	2.389700054	0.016862138	0.043297856
FANK1	32302.57143	-2.055469517	0.22504275	-9.133684679	6.62E-20	7.49E-18
LOC105606167	38.34086039	-2.804504446	0.56785134	-4.938800437	7.86E-07	6.78E-06
TCERG1L	47.64566814	-2.198750027	0.551894842	-3.984001767	6.78E-05	0.000356737
LOC121817655	3.172417691	-4.936111411	2.046588718	-2.411872677	0.015870823	0.041129217
PWWP2B	9.84648893	-3.602192856	1.045363981	-3.445874281	0.000569215	0.002333272
LOC114110282	20.96976417	-2.050888603	0.614564319	-3.337142328	0.000846446	0.003292163
PAOX	7.104015876	-2.749477714	1.127640373	-2.438257605	0.014758253	0.038662175
SPRN	4.793731897	-2.435221654	1.204045134	-2.022533529	0.043121263	0.094179584
LOC101109407	13.85633147	-2.245964912	0.793824948	-2.829294945	0.004665068	0.014515436
LOC121817710	10.60038945	2.666495938	0.843585082	3.160909307	0.001572775	0.005651275
LOC121817728	7.071619762	-2.382024013	1.005657772	-2.368622885	0.017854448	0.045380905
LOC101104287	5.625754302	2.771891667	1.223667186	2.265233307	0.023498366	0.056899074
LOC101104705	2.892318788	5.179780844	2.381900979	2.174641553	0.029656988	0.068914604
ENOSF1	9.447134193	-2.646002588	0.970791557	-2.725613516	0.00641821	0.019066786
LOC105604473	4.898013192	3.354654932	1.345129735	2.493926677	0.012633864	0.033987473
LOC105612300	8.382962232	-3.35191095	1.06795612	-3.138622352	0.001697441	0.006036844
KATNAL2	24.28646495	-2.314986772	0.60362102	-3.835165934	0.00012548	0.000612651
LOC121817718	6.736528718	3.430007353	1.230218343	2.78812893	0.005301344	0.016236933
LOC121817711	25.8121488	-2.322313146	0.560410639	-4.143949067	3.41E-05	0.000194077
LOC121817727	7.34760148	-2.761874476	1.069840418	-2.58157612	0.00983503	0.027519325
LOC121817744	42.41744463	-2.274219313	0.447901656	-5.077496996	3.82E-07	3.53E-06
LOC121817706	7.262251018	2.005455356	1.009145458	1.987280763	0.046891292	0.101105143
SNRNP25	3933.402837	-2.712781647	0.267502259	-10.14115414	3.63E-24	6.95E-22
RHBDF1	149.4446769	-2.024665217	0.287038037	-7.053647784	1.74E-12	5.56E-11
LOC114110674	43.15138512	-2.28634889	0.429819768	-5.319320009	1.04E-07	1.11E-06
HBM	66.11891872	-2.119837263	0.363659193	-5.829186513	5.57E-09	7.97E-08
WDR90	12.4859099	-2.480819061	0.788741568	-3.145287586	0.001659236	0.005915538
RHOT2	41.59233382	-2.236768259	0.473079676	-4.728100515	2.27E-06	1.74E-05
LOC101103616	18.49379858	-2.058134733	0.643402335	-3.198830065	0.001379865	0.005042051
WDR24	206.9705124	-2.225225771	0.331835632	-6.705807205	2.00E-11	5.09E-10
CHTF18	107.007549	-2.207298891	0.375100937	-5.884546455	3.99E-09	5.93E-08
GNG13	6.322515785	-3.377452327	1.226050182	-2.754742324	0.005873838	0.017690284
HAGH	894.9505381	-2.691232941	0.360354089	-7.468301388	8.12E-14	3.31E-12
TSC2	295.2556455	-2.361097571	0.293613518	-8.041515221	8.87E-16	5.24E-14
RAB26	5.139341899	-4.617182977	1.560977397	-2.957879458	0.003097632	0.010217344
ECI1	99.21076805	-2.85026907	0.419587147	-6.793032368	1.10E-11	2.94E-10
CCNF	311.4112342	-2.805187769	0.28558201	-9.822704744	8.99E-23	1.42E-20
LOC114110634	11.72216867	-3.202603531	1.049615787	-3.051215094	0.002279172	0.007817041
TRAP1	875.019285	-2.140076594	0.285655104	-7.491819915	6.79E-14	2.83E-12
NUDT16L1	343.8220418	-2.367642575	0.286378242	-8.267536522	1.37E-16	9.30E-15
EEF2KMT	648.0831037	-2.467115001	0.685729114	-3.59779824	0.000320922	0.001407352
LOC101105047	59.58826204	-2.113772803	0.405951286	-5.20696171	1.92E-07	1.91E-06
CIITA	4.300234004	-3.406057348	1.481854842	-2.298509444	0.021532811	0.052903719
PRM1	13.73573126	-3.484809376	0.850577176	-4.096993753	4.19E-05	0.000232104
XYLT1	7.294239249	-2.452062489	1.096390037	-2.236487388	0.025319863	0.060490633
LOC101107031	13.52985968	2.900506999	0.762150936	3.805685805	0.000141412	0.000682455
LOC105604711	31.3425736	-2.89967483	0.592827369	-4.891263429	1.00E-06	8.44E-06
C24H16orf82	5.254409532	-5.662630426	1.611124825	-3.51470621	0.000440241	0.001860644
LOC101111245	9.405726981	3.057888116	0.915502286	3.340120679	0.00083742	0.00326111
LOC105604726	17.30439595	-4.130741454	0.856318122	-4.823839819	1.41E-06	1.14E-05
TUFM	572.7297026	-2.320997151	0.25842472	-8.981327896	2.68E-19	2.70E-17
LOC101114075	26.79901195	3.855666205	0.725222088	5.316531679	1.06E-07	1.13E-06
BOLA2B	671.9924448	-2.310168876	0.233015408	-9.914232253	3.61E-23	5.90E-21
ASPHD1	8.475899546	-3.031083482	1.067618401	-2.839107568	0.00452399	0.014160942
LOC101119435	7670.59811	-2.499092693	0.222918827	-11.21077447	3.61E-29	1.21E-26
MYLPF	118.1117642	-2.225889984	0.341383097	-6.520211473	7.02E-11	1.59E-09
NUPR2	18.30154827	-3.131992273	0.720277704	-4.348312121	1.37E-05	8.58E-05
ASL	1534.246352	-2.770038836	0.204059844	-13.57463957	5.66E-42	5.91E-39
VPS37D	6.669990859	-2.048051941	1.006846619	-2.034125061	0.041938988	0.092001205
UPK3B	6.731273539	-3.476662538	1.224296175	-2.839723435	0.004515266	0.01413599
LOC121817827	1998.419042	-2.050387688	0.255458404	-8.026307448	1.00E-15	5.91E-14
ZNHIT1	1911.685587	-3.006900238	0.193549243	-15.53558252	1.99E-54	4.68E-51
TRIM56	15.50012463	2.496913167	0.733903154	3.402237954	0.000668364	0.002673741
LOC101122753	5.673868556	-2.698335829	1.1977316	-2.252871869	0.024267229	0.058451774
BUD31	7296.363353	-2.006875052	0.230709601	-8.698706262	3.36E-18	2.97E-16
TECPR1	12.03168043	-2.135726143	0.796871295	-2.680139384	0.007359151	0.021471432
AP5Z1	18.3212628	-2.231451547	0.717737156	-3.109009377	0.001877158	0.006588648
FOXK1	28.22427161	-2.804474299	0.631934797	-4.43791719	9.08E-06	5.97E-05
INTS1	62.12907236	-2.341249268	0.439586577	-5.326025384	1.00E-07	1.08E-06
C24H7orf50	112.5425364	-2.312536042	0.393564978	-5.875868466	4.21E-09	6.21E-08
LOC101120042	589.6493118	-2.926290389	0.324926391	-9.006010203	2.14E-19	2.20E-17
LOC105604916	7.342995582	-2.47990948	0.999079278	-2.48219489	0.013057584	0.034878422
GNG4	398.9336371	-2.140458032	0.34207717	-6.257237318	3.92E-10	7.49E-09
LOC121817972	4.917200144	2.892579894	1.261740299	2.292531907	0.021874969	0.053583115
TMEM26	8.489350967	3.14327789	1.075245912	2.923310708	0.003463307	0.011259346
LOC121817998	38.4010002	2.11553648	0.766535361	2.759868087	0.005782471	0.017480393
EGR2	5.877461705	2.023163899	1.017102011	1.989145511	0.046685144	0.100730051
LOC105604976	16.40237485	-2.135700121	0.67220891	-3.177137479	0.001487365	0.005378344
LOC105604980	195.2400144	-2.229484094	0.290159944	-7.683638417	1.55E-14	7.21E-13
LOC105604981	3.497214836	-4.030570802	1.737335926	-2.319972058	0.020342389	0.050554444
LOC121817974	500.4699686	-2.486975113	0.266557597	-9.329972727	1.06E-20	1.32E-18
LOC106990702	8.513832998	-4.452691195	1.313464259	-3.390036055	0.000698834	0.002777881
ZSWIM8	361.7476054	-2.471738	0.377961448	-6.539656402	6.17E-11	1.42E-09
LOC121817944	33577.38378	-2.067396756	0.220409226	-9.379810408	6.61E-21	8.44E-19
ANXA11	867.83755	-2.220229923	0.290063542	-7.654288112	1.94E-14	8.95E-13
ADIRF	509.938985	-2.419350435	0.297235007	-8.139520515	3.97E-16	2.46E-14
LOC106991932	5.414288326	-4.690443339	1.566562463	-2.99409915	0.002752565	0.009197664
SYT15	11.5108837	-3.428201936	1.197086963	-2.863786878	0.004186096	0.01325797
ARHGAP22	750.6258568	-2.56319492	0.339739906	-7.544580071	4.54E-14	1.95E-12
LOC101118849	3490.076649	-2.066564964	0.207883832	-9.940960528	2.76E-23	4.55E-21
LOC121817975	1462.468291	-2.215338653	0.201277912	-11.00636741	3.56E-28	1.09E-25
LOC105605067	187.5505746	-2.351758995	0.305675472	-7.693646402	1.43E-14	6.74E-13
DEPP1	700.766207	-2.937364482	0.379060495	-7.749065185	9.26E-15	4.53E-13
LOC105605117	14.47423654	-2.03156563	0.702574387	-2.891602181	0.003832829	0.012303055
HELT	82.03966892	-2.316229817	0.401897679	-5.763232623	8.25E-09	1.13E-07
CNOT7	2287.144338	2.111856152	0.257658425	8.19634037	2.48E-16	1.59E-14
MSR1	34.88924762	2.165688304	0.746923307	2.899478816	0.003737836	0.012049628
LOC114111115	13.26977806	-2.77671764	0.776526522	-3.57581816	0.000349134	0.001514797
ADGRA2	8.846048668	-2.122524193	0.977782482	-2.170752936	0.029949853	0.069483364
LOC114110969	7.744850446	-2.062022376	0.946395828	-2.178816003	0.02934534	0.068334175
THRB	47.41427716	-2.234333167	0.537777942	-4.154750488	3.26E-05	0.000186317
LOC121818045	11.19742787	-2.515141279	0.855938237	-2.938461176	0.00329846	0.010788796
LOC105605313	387.8216066	-2.672878265	0.232240645	-11.50908908	1.19E-30	4.85E-28
GTPBP6	9.760358085	-2.464068839	0.946312169	-2.603864686	0.009217914	0.026033087
LOC106990535	6.911900758	-2.358738414	1.027232301	-2.296207402	0.021664026	0.053170445
ASB9	14.55616232	2.747188669	0.865276978	3.174924028	0.001498757	0.005417452
LOC105605424	119.4156036	-3.230670674	0.388649735	-8.31255082	9.37E-17	6.51E-15
LOC101120811	533.1124588	-3.359726594	0.789840859	-4.253675351	2.10E-05	0.000125739
LOC101121576	19.75280657	2.092105251	0.732319641	2.8568198	0.004279087	0.013504655
MAOA	18.14939985	2.764367003	0.905064122	3.054332767	0.002255617	0.007747573
MAOB	11.10668369	6.138185599	1.442149832	4.256274532	2.08E-05	0.000124425
LOC101106910	90.74539726	10.14645217	1.270778731	7.984436568	1.41E-15	8.13E-14
LOC105605445	10.43004877	3.445605462	1.065661071	3.233303305	0.001223676	0.00455128
CCDC22	313.9051592	-2.151814349	0.256434451	-8.391284183	4.81E-17	3.45E-15
LOC121818362	25.01333844	-3.490667475	0.653322947	-5.342943322	9.14E-08	9.98E-07
TIMM17B	3815.871339	-2.029196787	0.212746562	-9.538094368	1.45E-21	2.05E-19
HDAC6	122.8826422	-2.14728806	0.336828146	-6.375025614	1.83E-10	3.73E-09
GLOD5	40.5422839	-2.586046216	0.478755393	-5.401602271	6.60E-08	7.45E-07
SUV39H1	103.6621936	-2.603589433	0.37509614	-6.941125633	3.89E-12	1.16E-10
UXT	2515.159492	-2.184594108	0.235214538	-9.287666183	1.58E-20	1.91E-18
TIMP1	5961.768994	6.432061047	0.345836794	18.59854461	3.30E-77	6.20E-73
NDUFB11	1917.176033	-2.595642333	0.183374868	-14.15484228	1.74E-45	2.18E-42
IL2RG	6.587096963	2.733790307	1.338601271	2.042273802	0.041124379	0.090573961
LOC101123534	16.07724289	-2.256279277	0.81809596	-2.757964087	0.005816259	0.01756194
TENT5D	320.8684691	2.345060106	0.358154444	6.547622528	5.85E-11	1.35E-09
NAA10	1397.002639	-2.450975928	0.281190146	-8.716436045	2.87E-18	2.56E-16
CMC4	732.9683483	-2.209386278	0.234646856	-9.41579323	4.70E-21	6.21E-19
LOC121818340	34.01906958	2.154461784	0.553243969	3.894234559	9.85E-05	0.000496593
SLITRK2	21.25500933	2.228819782	0.891733602	2.499423346	0.012439561	0.033547332
LOC114111370	126.4297064	-2.271122418	0.367586328	-6.178473581	6.47E-10	1.18E-08
LOC114111393	4.186810778	-2.684723023	1.323802665	-2.02803869	0.042556299	0.093202961
LOC114111480	11767.77933	-2.043033734	0.187625033	-10.88891874	1.30E-27	3.70E-25
LOC101106831	19.84385392	-2.826687758	0.689962515	-4.096871491	4.19E-05	0.000232104
LOC105605613	35.06678029	2.213342283	0.462657995	4.78397068	1.72E-06	1.36E-05
PLS3	237.4140132	2.134776885	0.391229886	5.456579266	4.85E-08	5.67E-07
TRPC5	7.679521331	2.085619438	0.970287838	2.149485294	0.031595951	0.072819991
TRPC5OS	2347.559265	2.107994934	0.357632385	5.894306613	3.76E-09	5.62E-08
LOC121818326	10.95616867	-2.102728024	0.874544783	-2.404368609	0.016200429	0.041845805
KCNE5	10.94731145	-2.285094802	0.832656903	-2.744341389	0.006063245	0.018167804
VSIG1	29.50794629	2.068695299	0.54897409	3.768293141	0.000164368	0.000780009
FRMPD3	120.9580427	-2.979975794	0.389217828	-7.656318845	1.91E-14	8.83E-13
LOC114111703	12.62950994	-2.395009878	0.882870774	-2.712752475	0.006672693	0.019737214
LOC121818355	12.95685398	4.849290543	1.256927412	3.858051386	0.000114295	0.000564647
LOC105605648	3.125416967	4.25933337	1.738682635	2.449747461	0.014295644	0.037686874
LOC121818457	41.65969971	-2.199406946	0.503390719	-4.369184534	1.25E-05	7.88E-05
LOC114112704	187.4780399	3.196129732	0.302412096	10.56878934	4.16E-26	1.00E-23
